# Supplementary material for: Prolidase Stimulates Proliferation and Migration through Activation of the PI3K/Akt/mTOR Signaling Pathway in Human Keratinocytes
Source: MDPI journal article supplement (doi:10.3390/ijms21239243), 2020-12-03
Supplement: s1 [file s1]

## Supplementary Files

# **Prolidase Stimulates Proliferation and Migration Through Activation of the PI3K/Akt/mTOR Signaling Pathway in Human Keratinocytes**

**Magdalena Misiura <sup>1</sup>, Weronika Baszanowska <sup>2</sup>, Ilona Ościłowska <sup>2</sup>, Jerzy Pałka <sup>2</sup> and Wojciech Milyk <sup>1,\*</sup>**

<sup>1</sup> Department of Analysis and Bioanalysis of Medicines, Medical University of Białystok, Jana Kilińskiego 1, 15-089 Białystok; Poland; magdalena.misiura@umb.edu.pl (M.M.); wojciech.milyk@umb.edu.pl (W.M.)

<sup>2</sup> Department of Medicinal Chemistry, Medical University of Białystok, Jana Kilińskiego 1, 15-089 Białystok, Poland; w.baszanowska22@wp.pl (W.B.); ilona.zareba@gmail.com (I.O.); pal@umb.edu.pl (J.P.)

\* Correspondence: wojciech.milyk@umb.edu.pl; Tel.: +48-85-748-5845

**Incubation time – 0 h**  
PEPD concentration – 0 nM

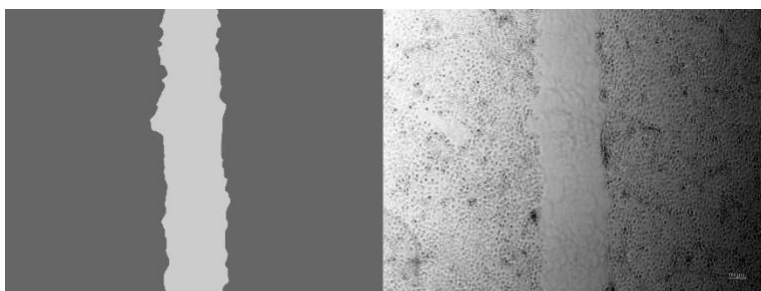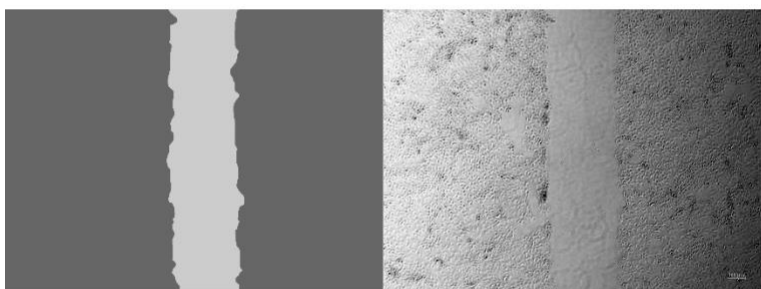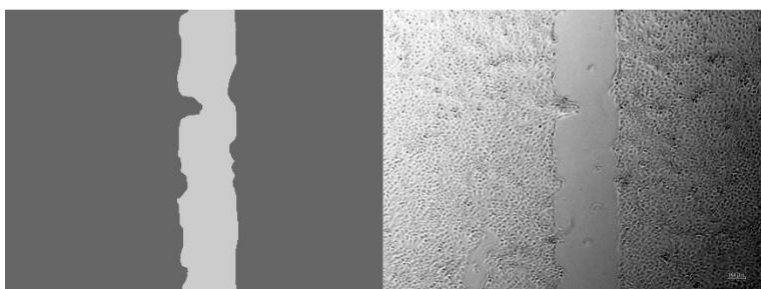

PEPD concentration – 50 nM

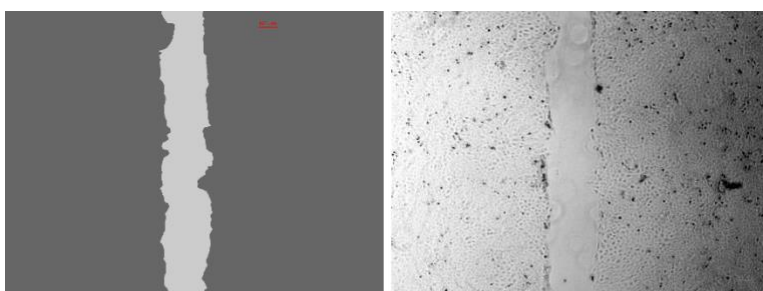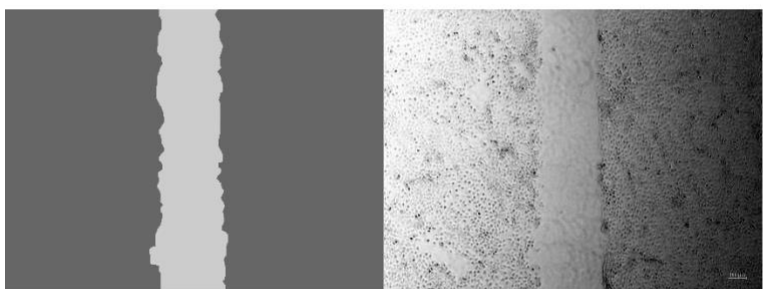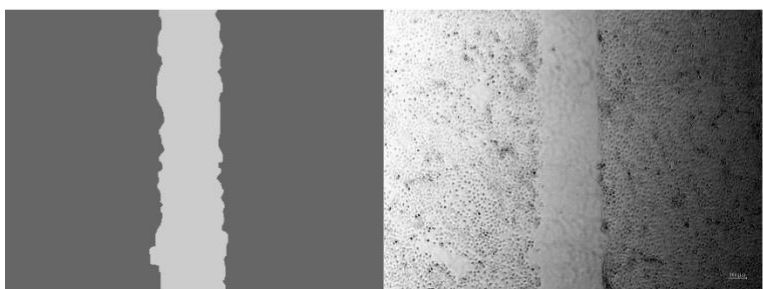

**Incubation time – 24 h**

PEPD concentration – 0 nM

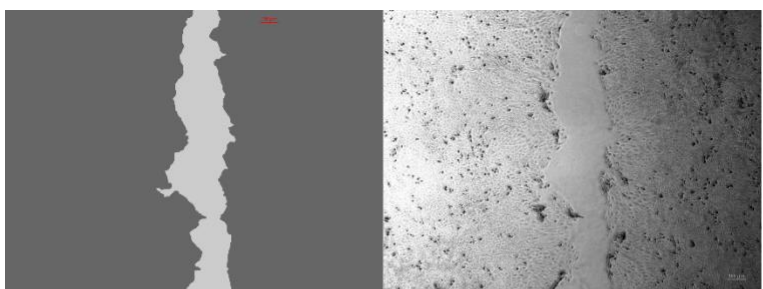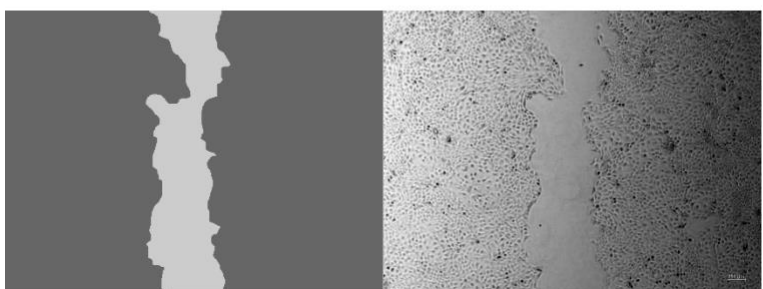

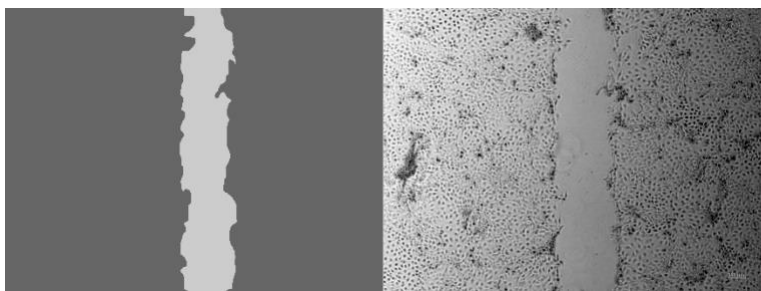

PEPD concentration – 50 nM

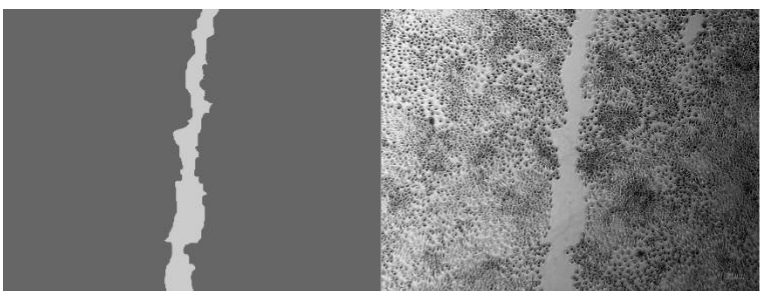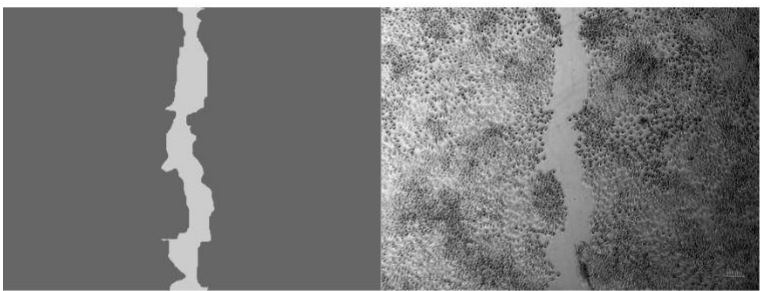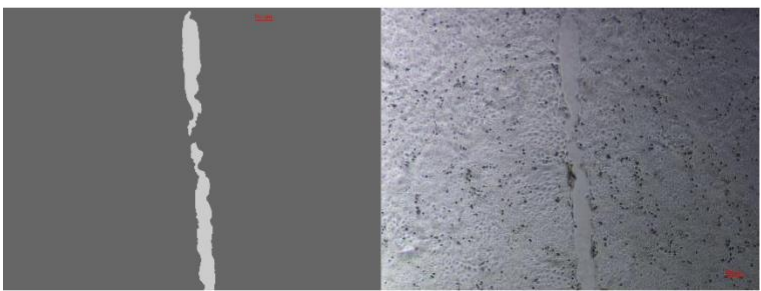

Incubation time – 48 h

PEPD concentration – 0 nM

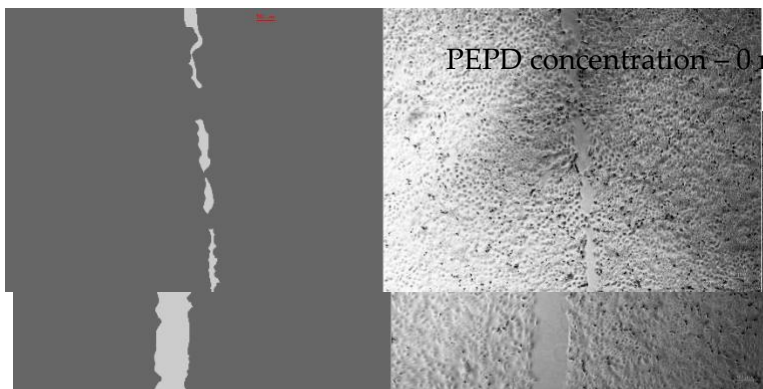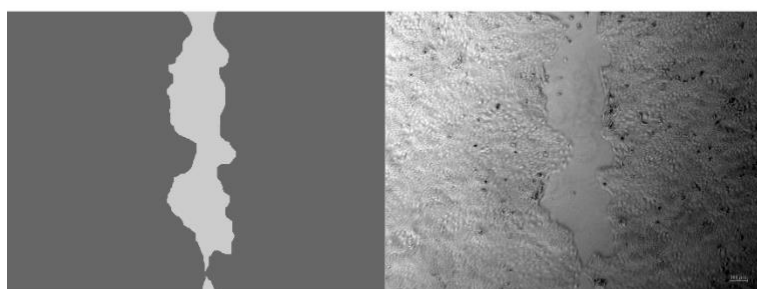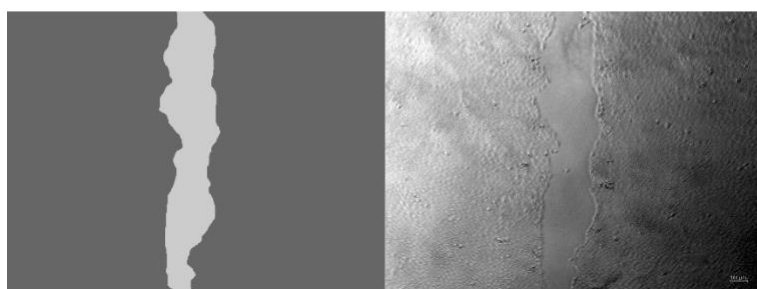

PEPD concentration – 50 nM

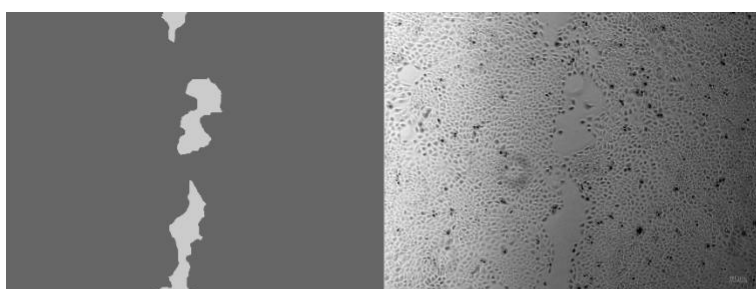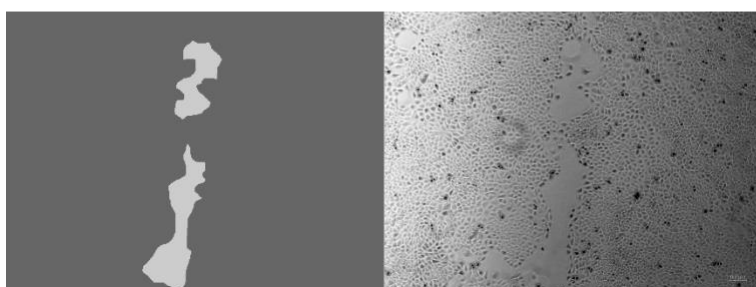

**Figure S1. Microscopic images of migration of HaCaT cells presented in Fig. 1B.**

EGFR expression and its intensity in EGF-treated HaCaT cells

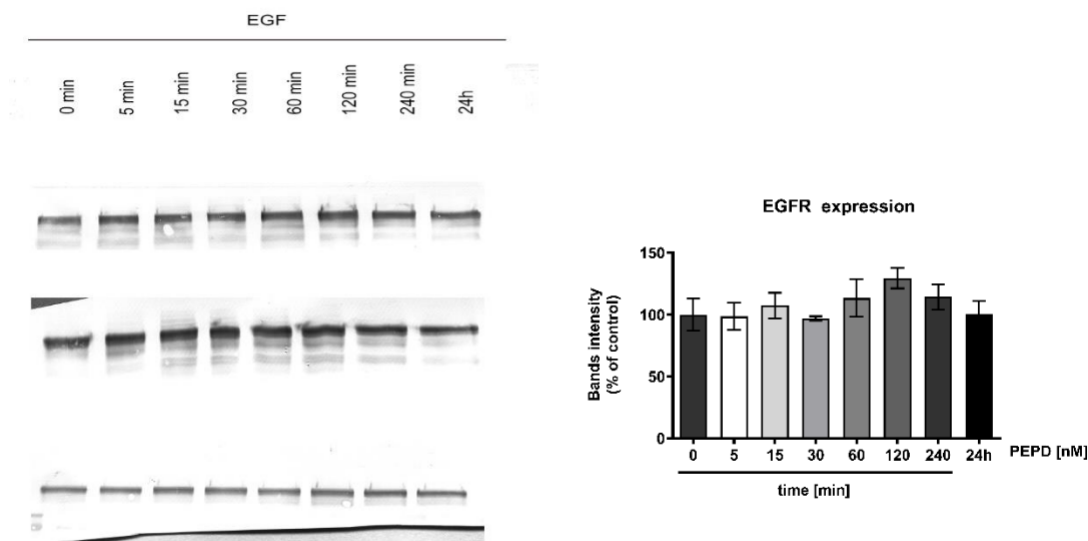

p-EGFR expression and its intensity in EGF-treated HaCaT cells

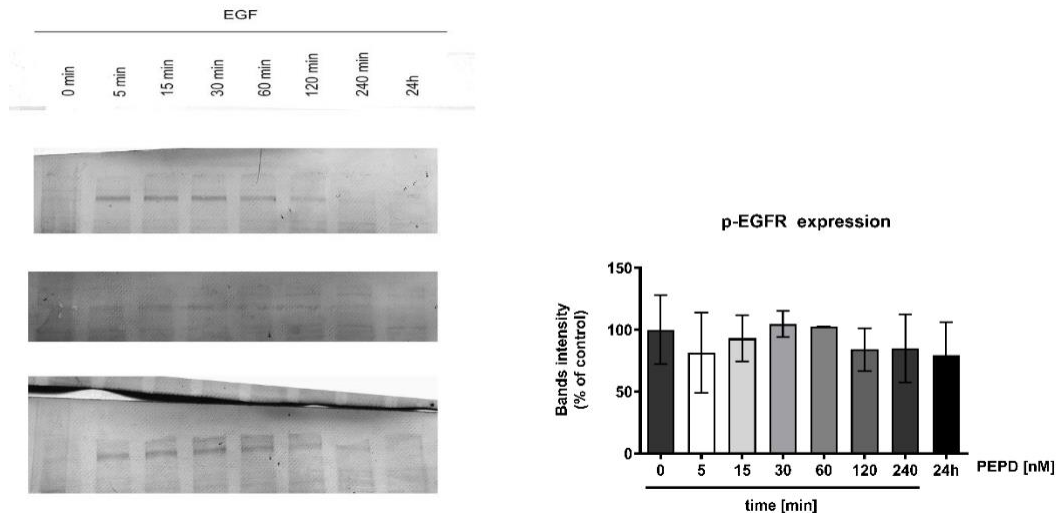

## Akt expression and its intensity in EGF-treated HaCaT cells

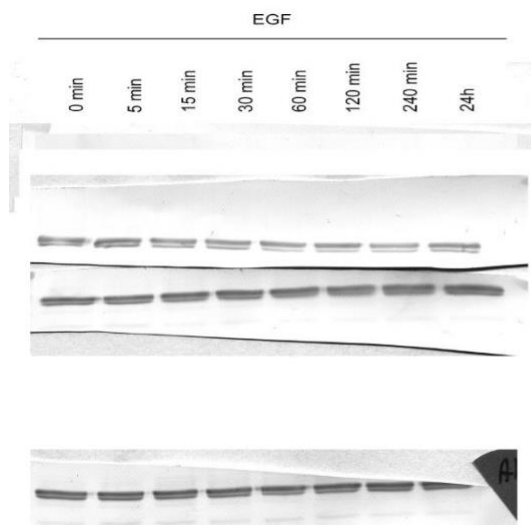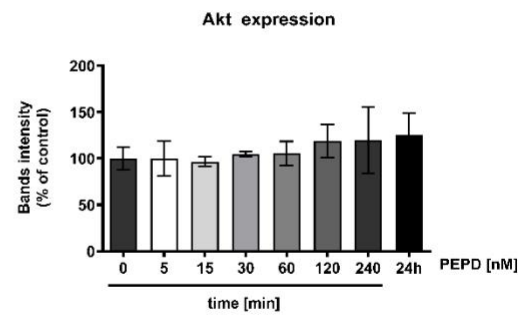

## p-Akt expression and its intensity in EGF-treated HaCaT cells

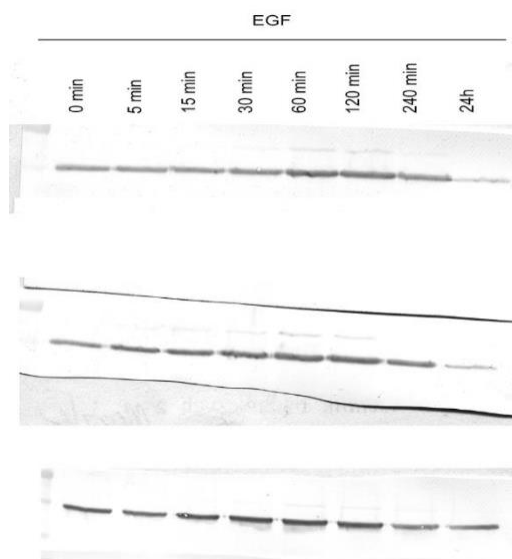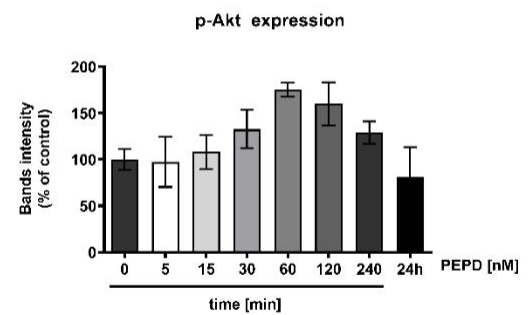



## mTOR expression and its intensity in EGF-treated HaCaT cells

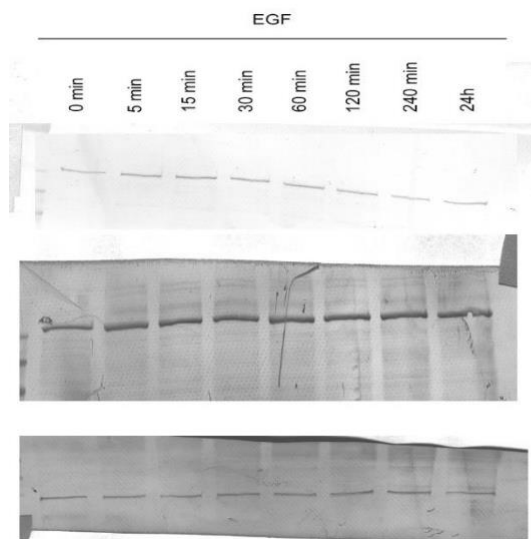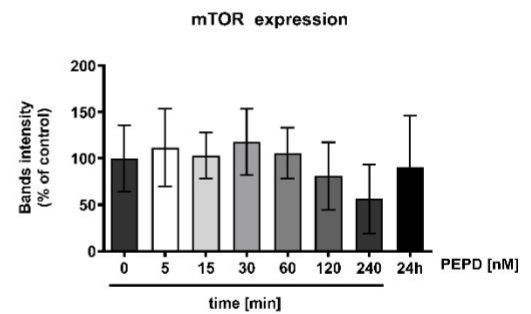

## p-mTOR expression and its intensity in EGF-treated HaCaT cells

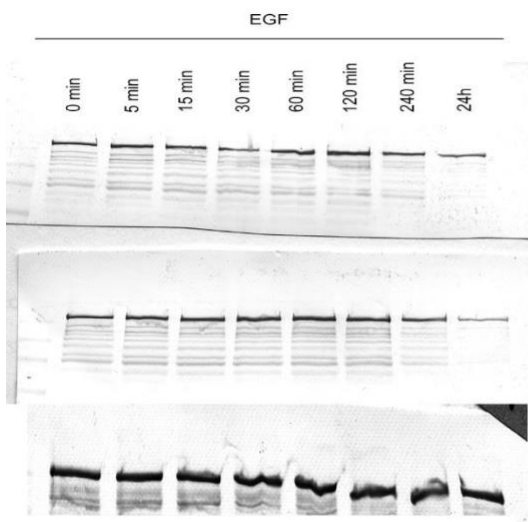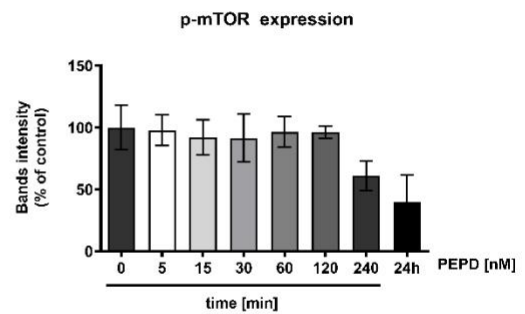

ERK1/2 expression and its intensity in EGF-treated HaCaT cells

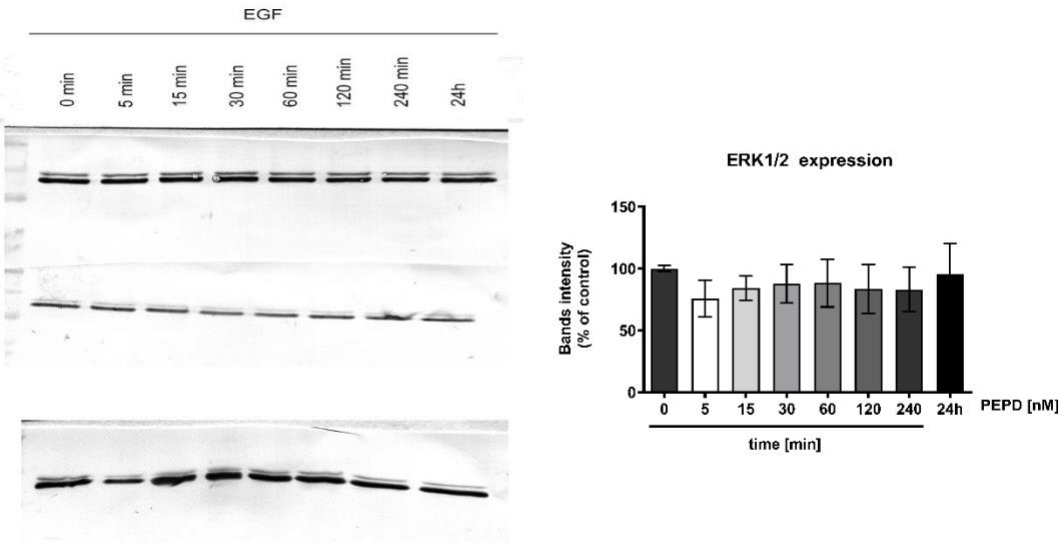

p-ERK1/2 expression and its intensity in EGF-treated HaCaT cells

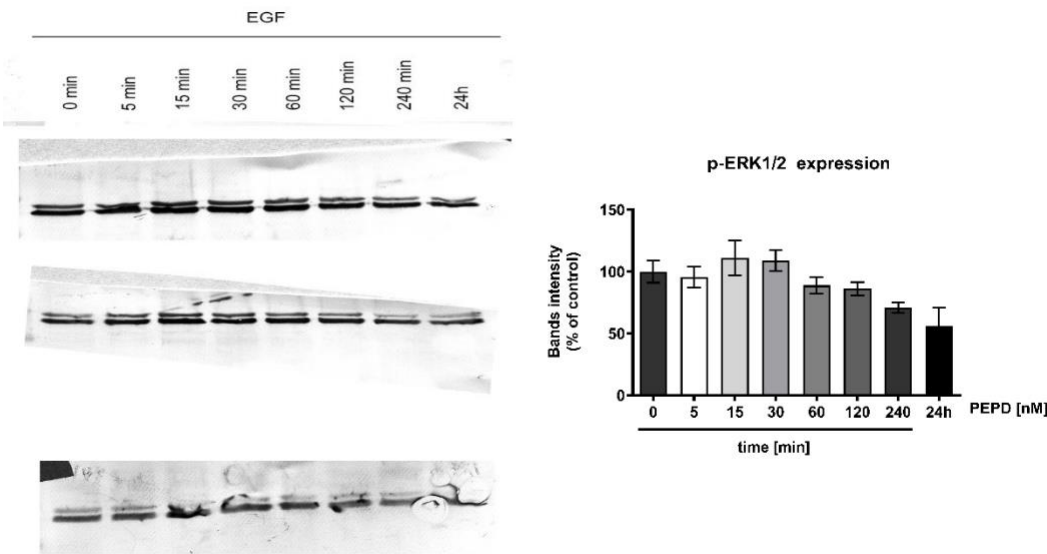

GAPDH expression and its intensity in EGF-treated HaCaT cells

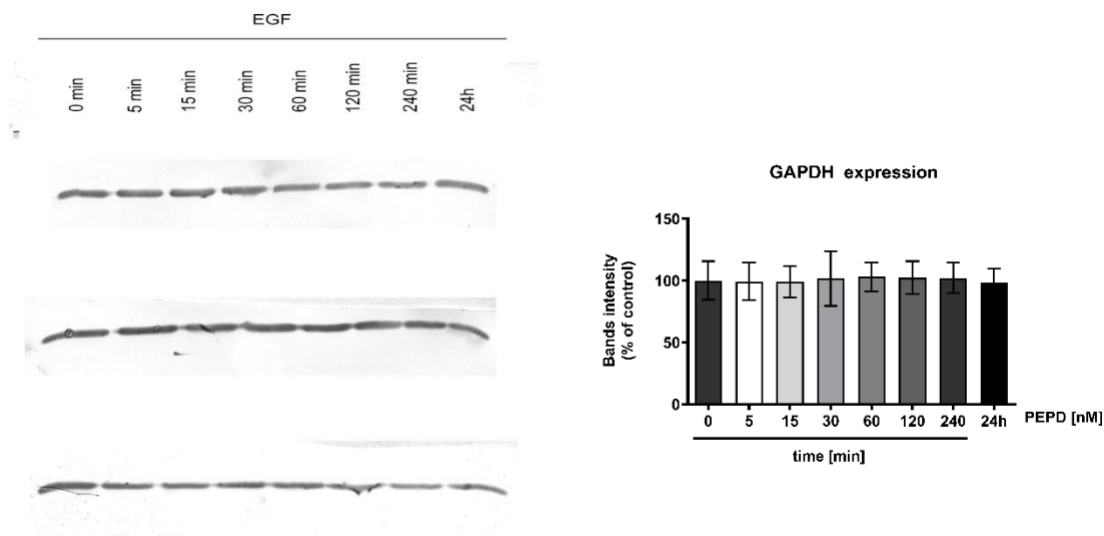

EGFR expression and its intensity in PEPD-treated HaCaT cells

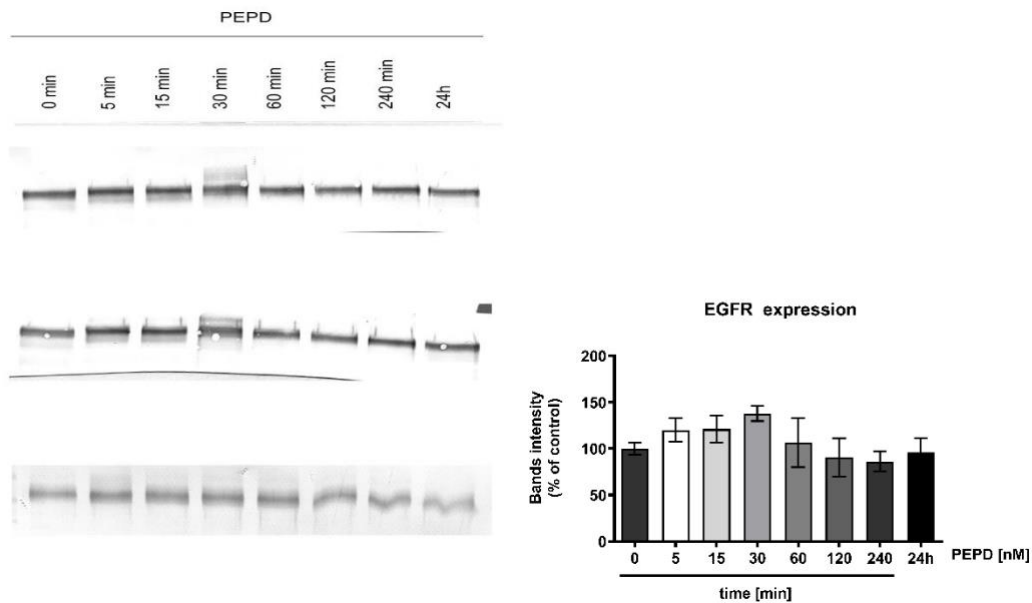

p-EGFR expression and its intensity in PEPD-treated HaCaT cells

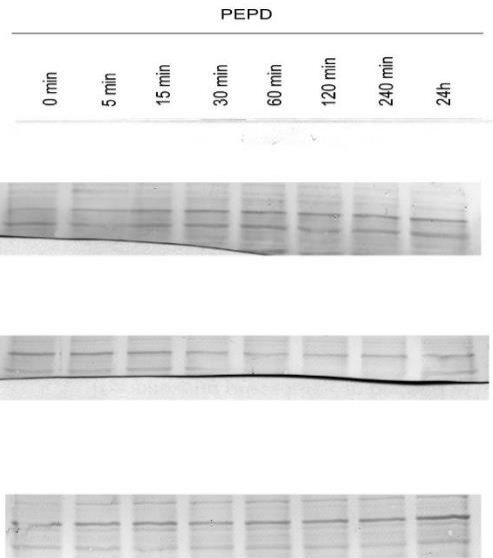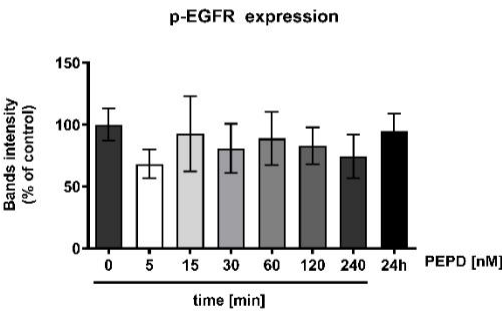

Akt expression and its intensity in PEPD-treated HaCaT cells

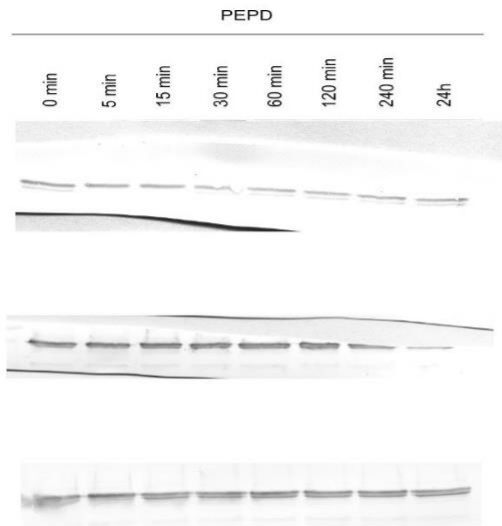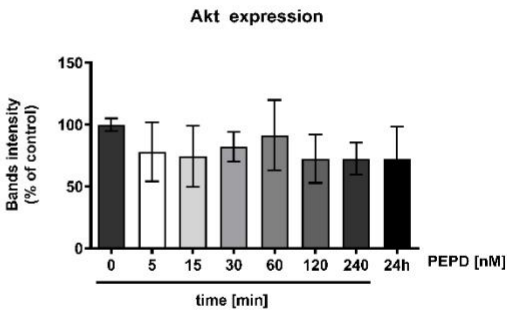

## p-Akt expression and its intensity in PEPD-treated HaCaT cells

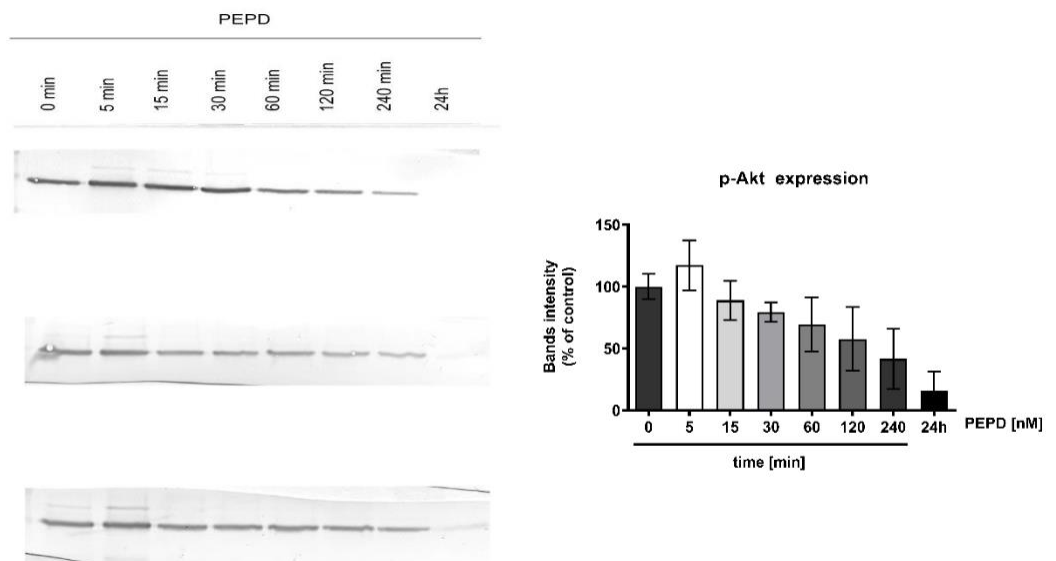

## mTOR expression and its intensity in PEPD-treated HaCaT cells

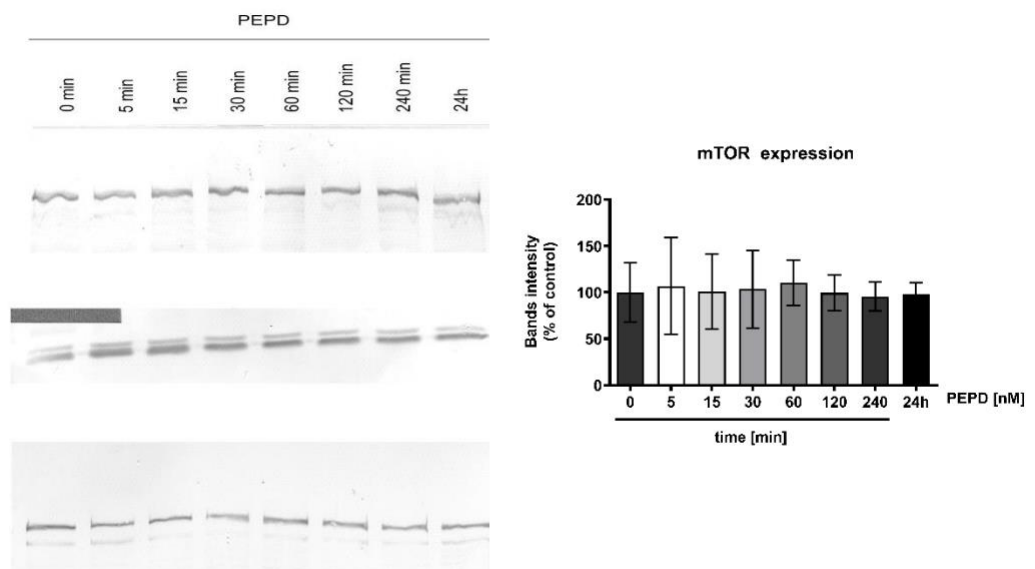

### p-mTOR expression and its intensity after PEPD-treated

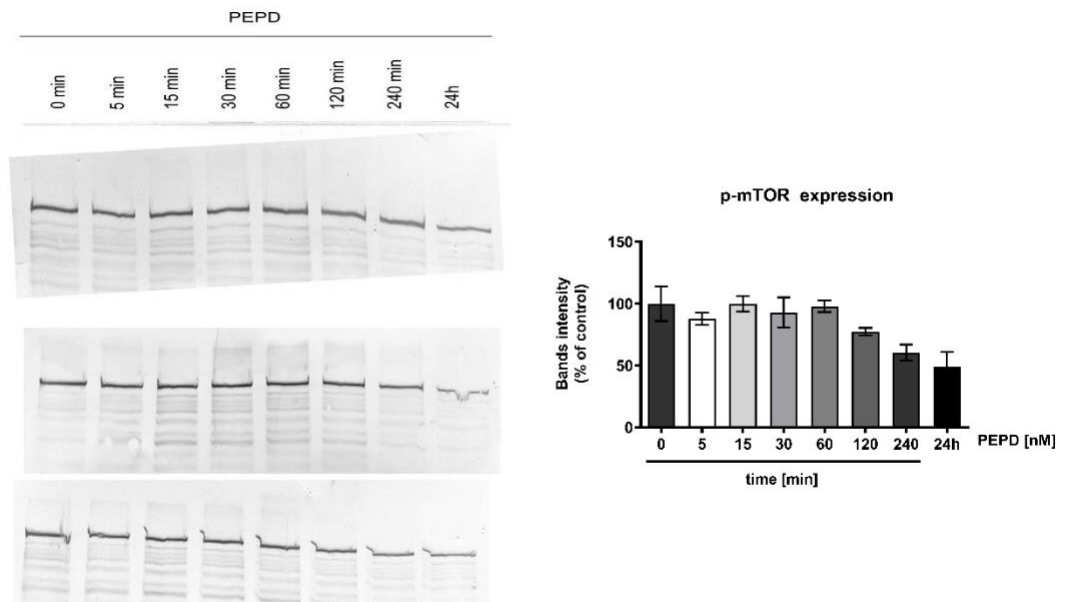

### ERK1/2 expression and its intensity after PEPD-treated

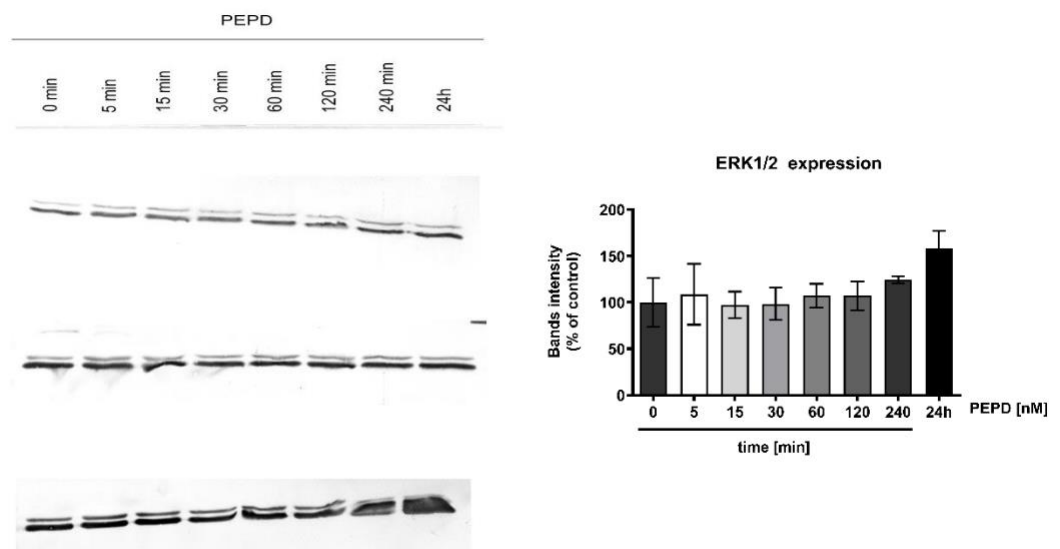

### p-ERK1/2 expression and its intensity after PEPD-treated

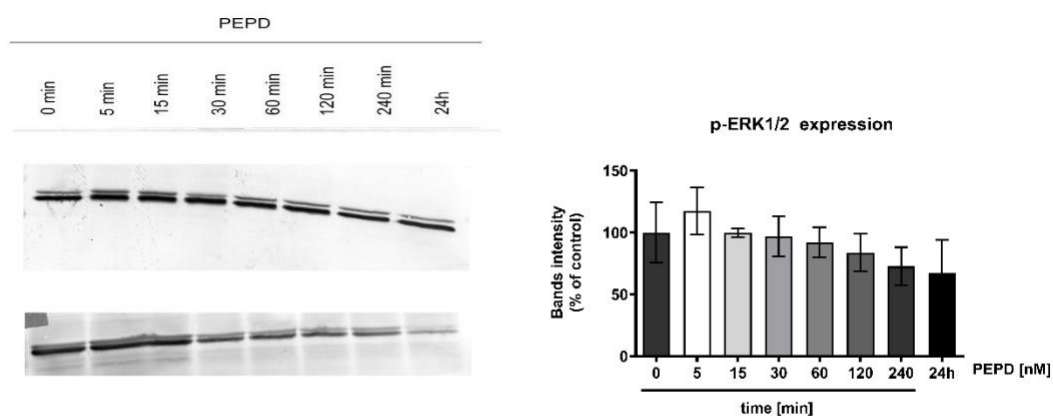

### GAPDH expression and its intensity in PEPD-treated HaCaT cells 8

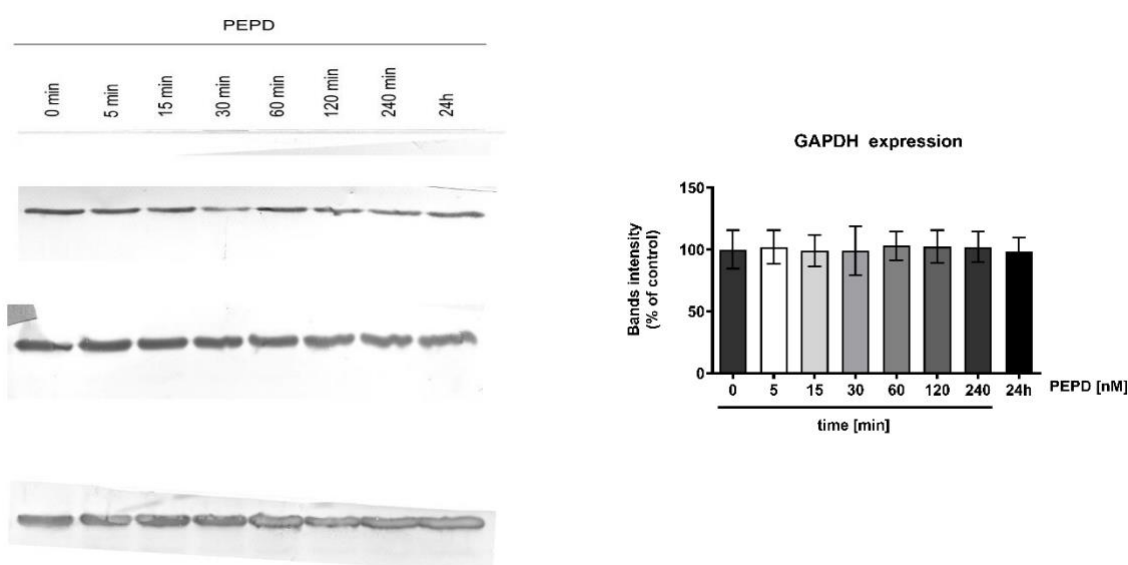

Figure S2. Representative blots from Western blotting analysis presented in Figure 3A and B.

## EGFR expression and its intensity

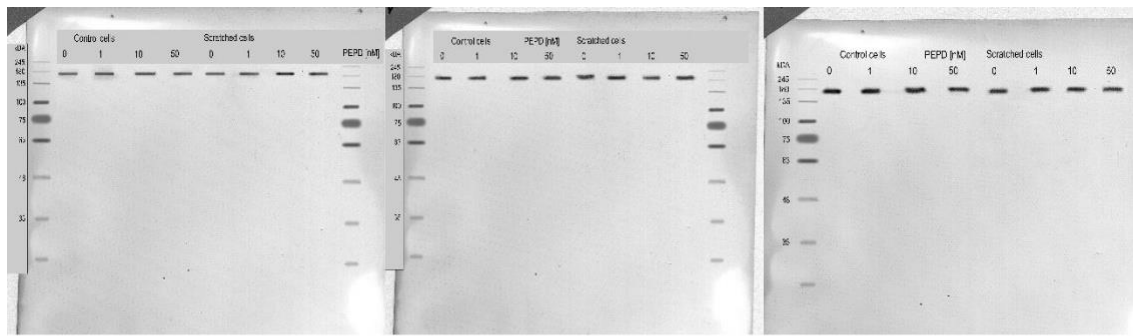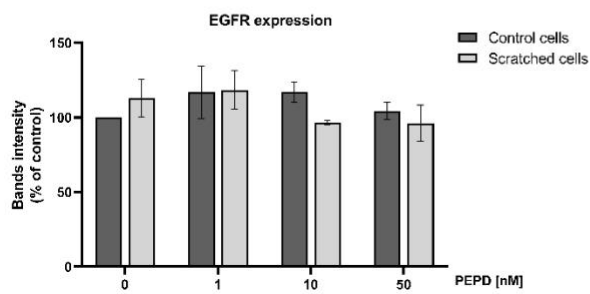

## p-EGFR expression and its intensity

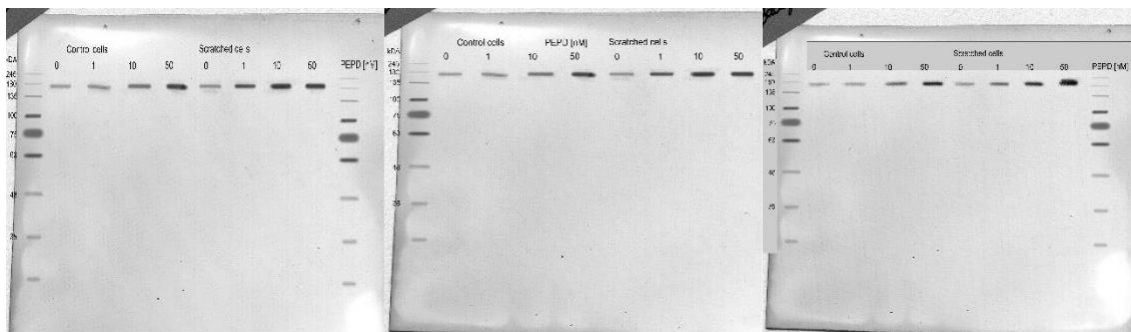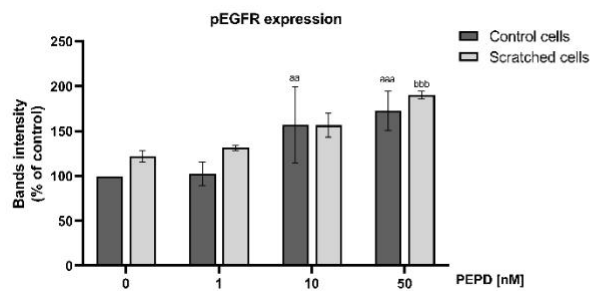



PI3K expression and its intensity

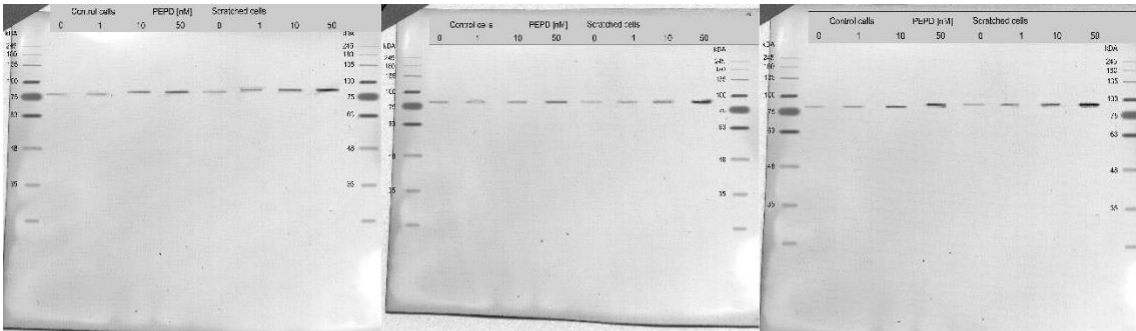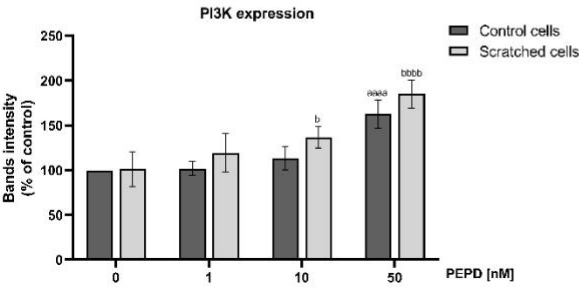

p-PI3K expression and its intensity

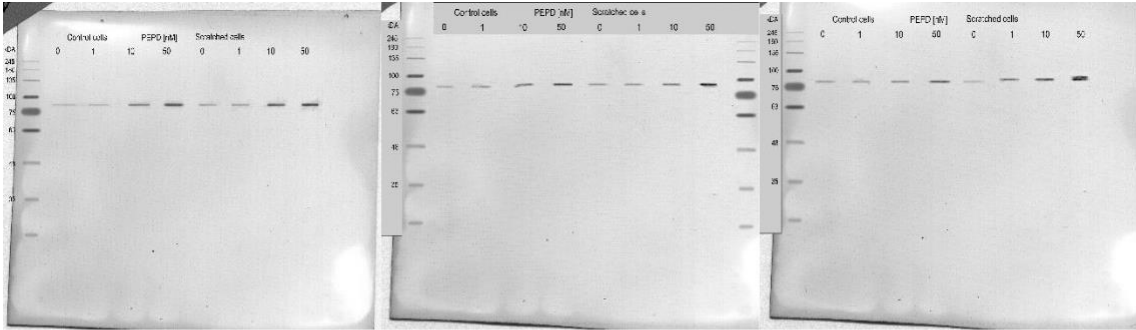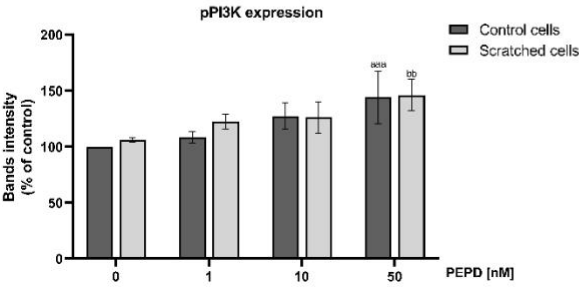

## Akt expression and its intensity

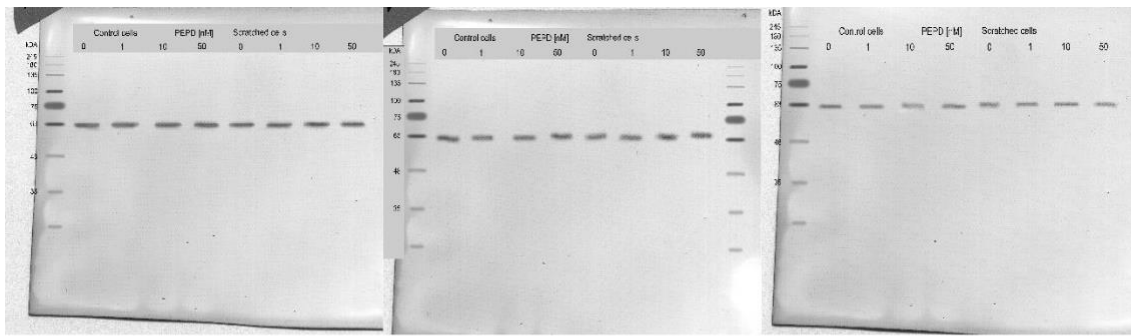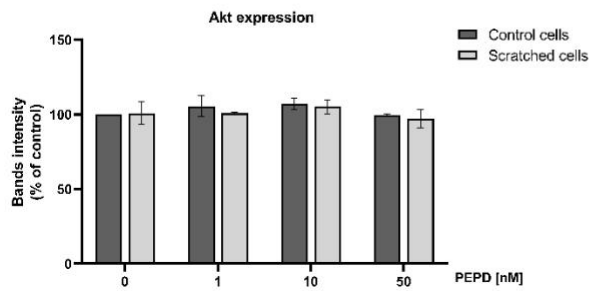

## p-Akt expression and its intensity

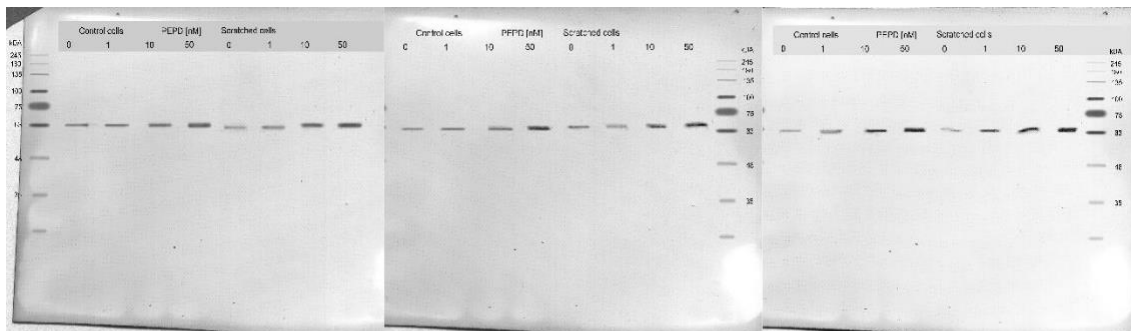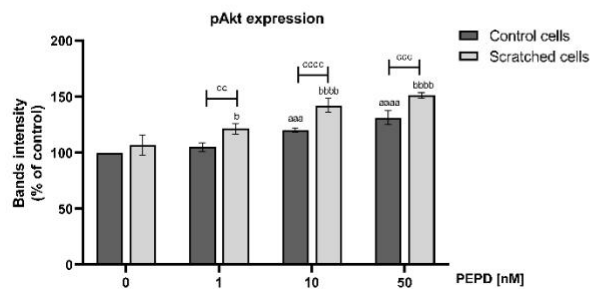

mTOR expression and its intensity

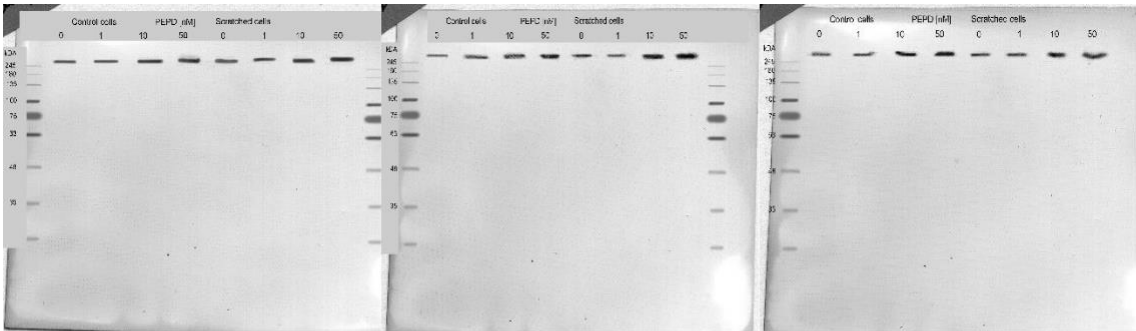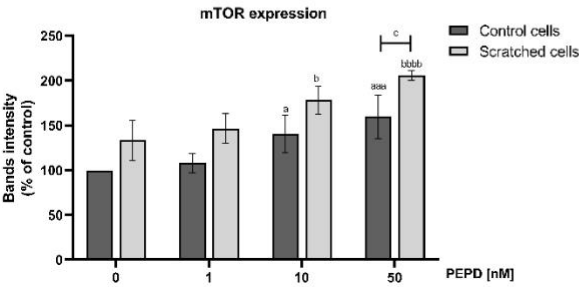

p-mTOR expression and its intensity

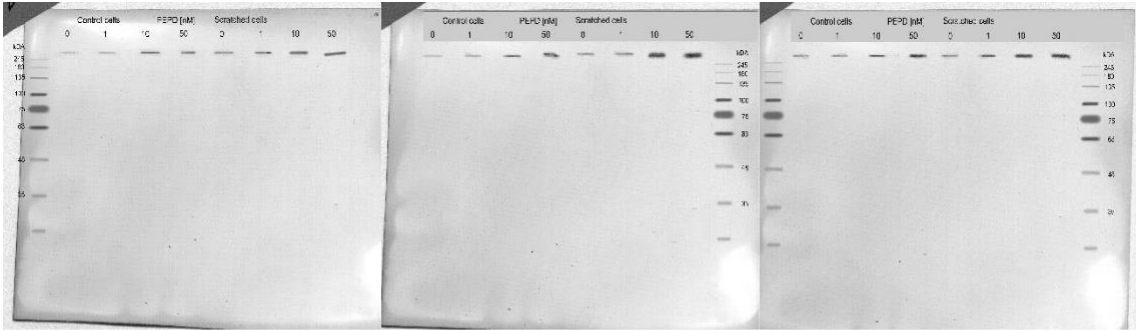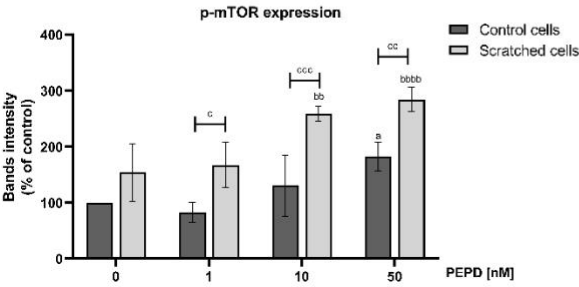

## GAPDH expression and its intensity

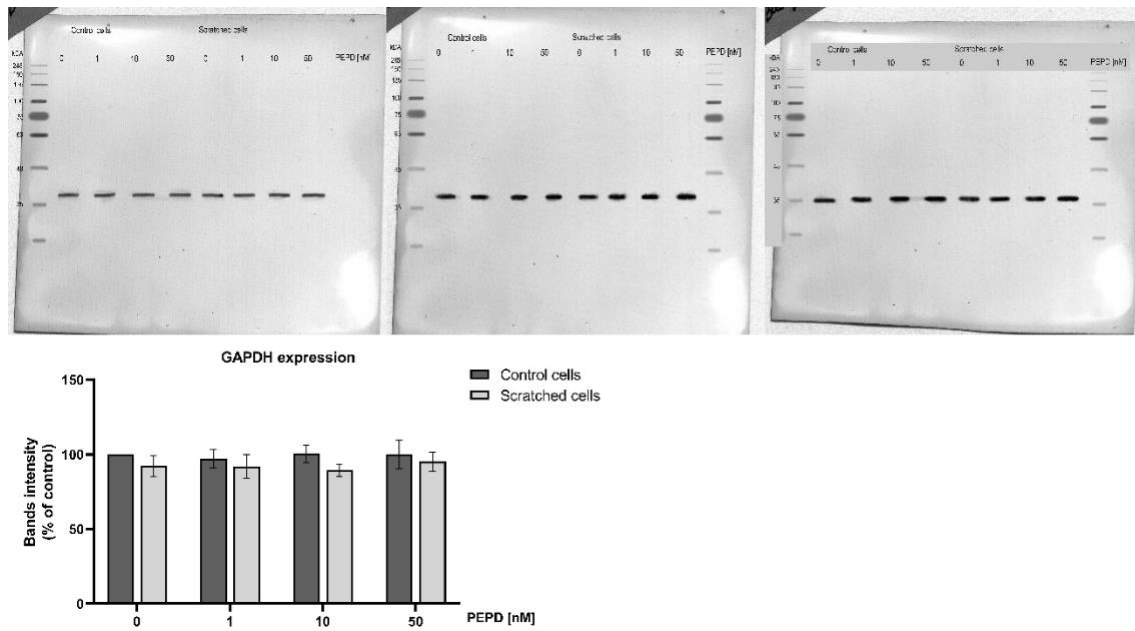

Figure S3. Representative blots from Western blotting analysis presented in Figure 4A.

## EGFR expression and its intensity

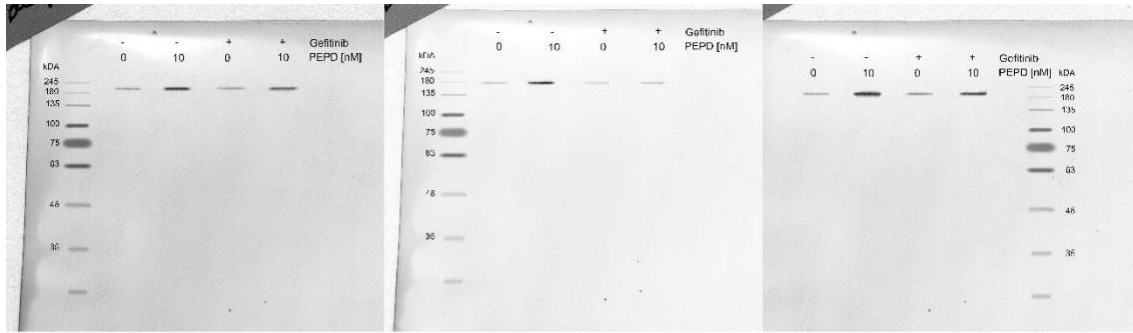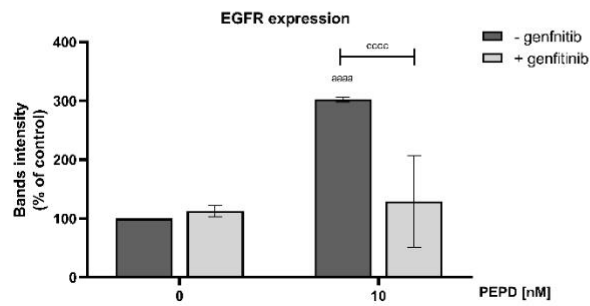

## p-EGFR expression and its intensity

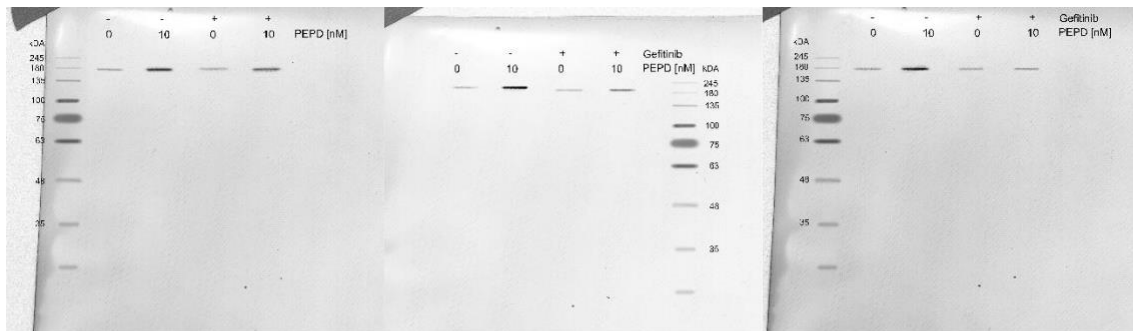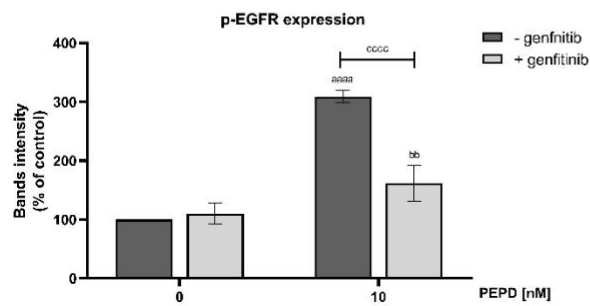

## Akt expression and its intensity

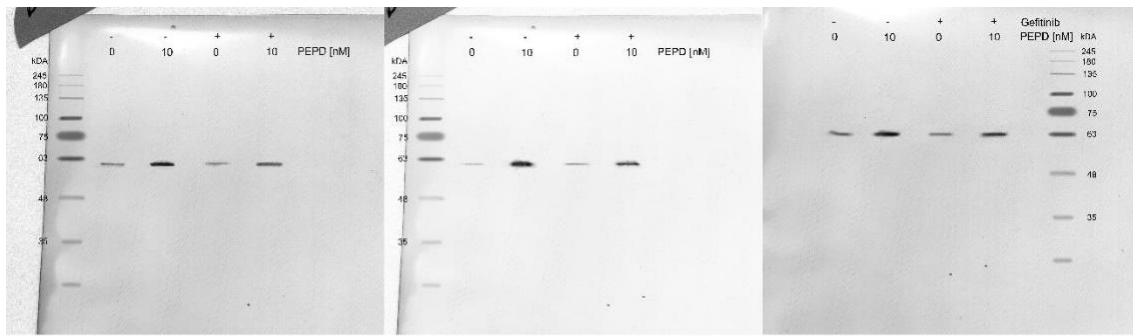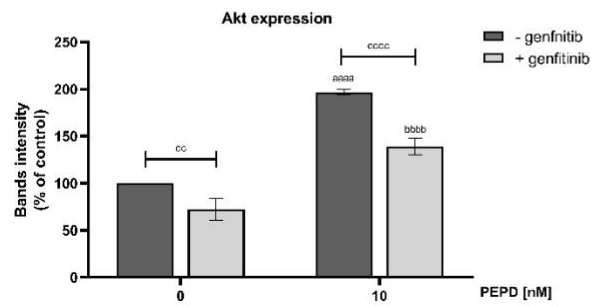

## p-Akt expression and its intensity

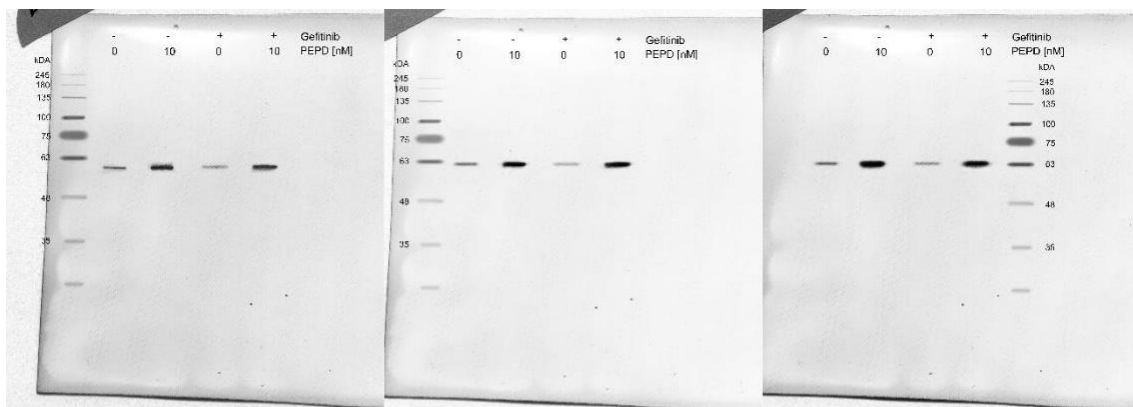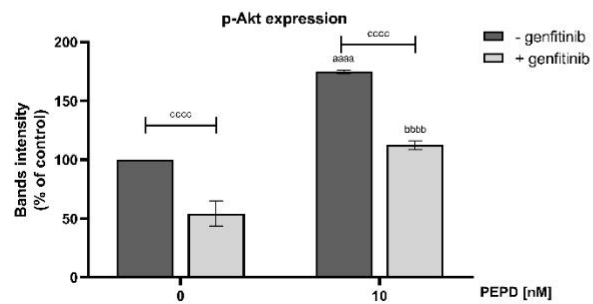

## GAPDH expression and its intensity

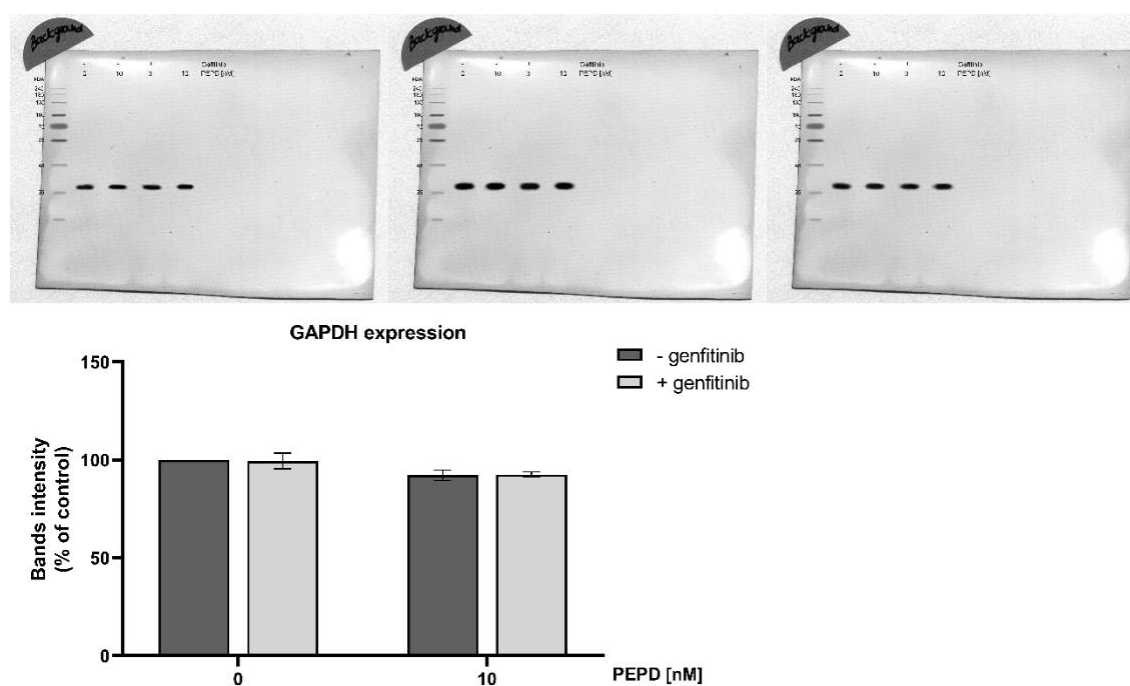

Figure S4. Representative blots from Western blotting analysis presented in Figure 5A.

**Incubation time – 0 h**

**PEPD concentration – 0 nM**

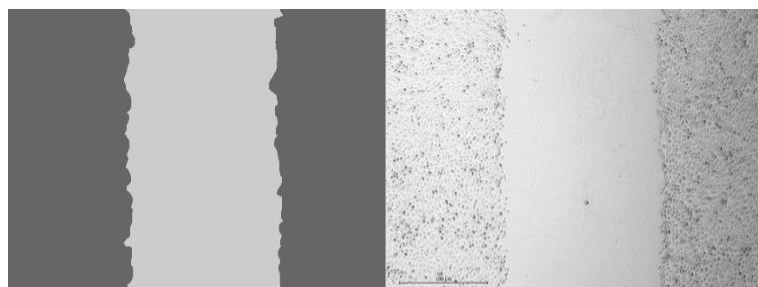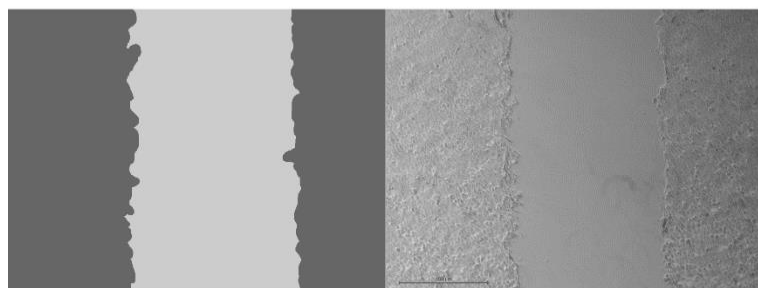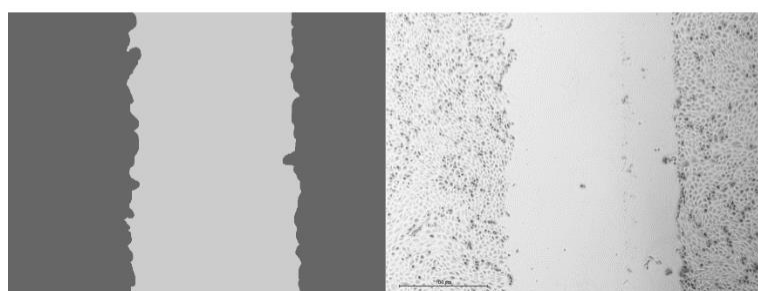

**PEPD concentration – 10 nM**

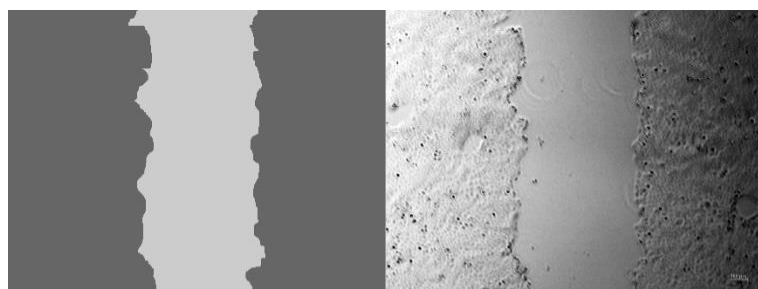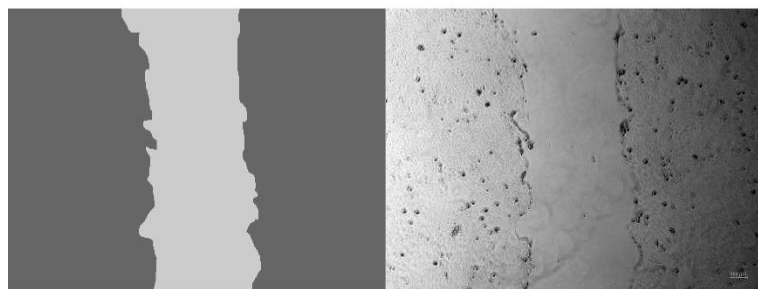



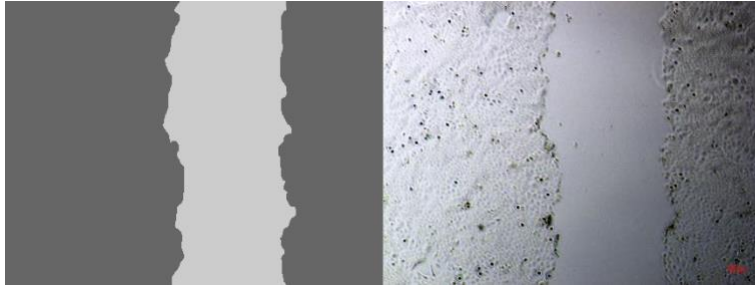

**PEPD concentration – 0 nM + Gefinitib**

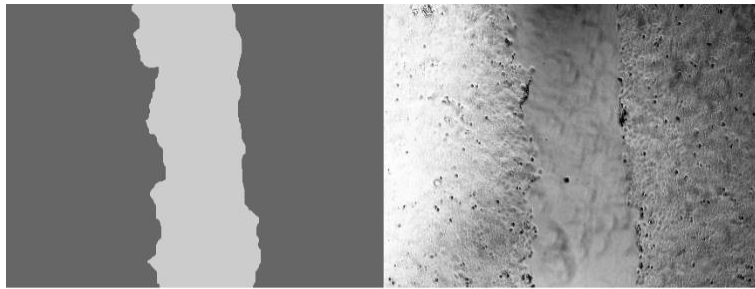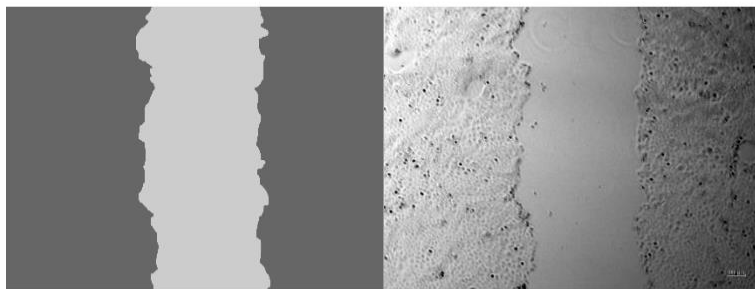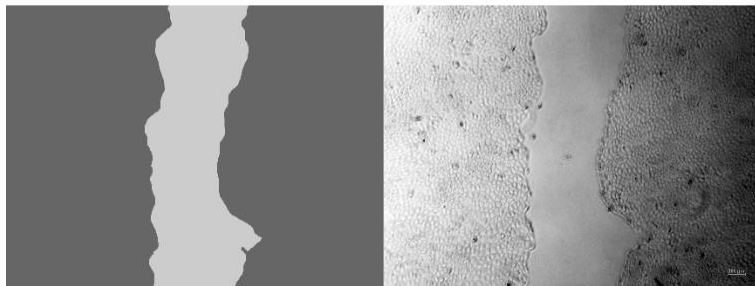

**PEPD concentration – 10 nM + Gefinitib**

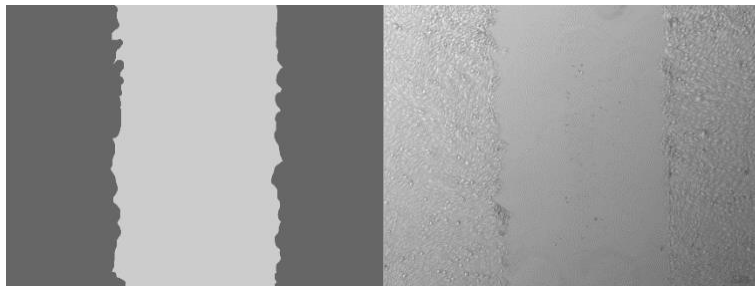

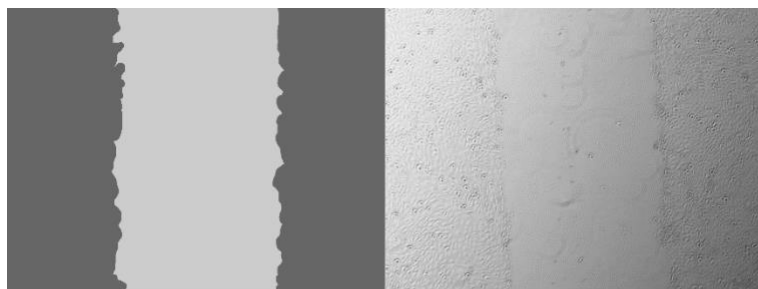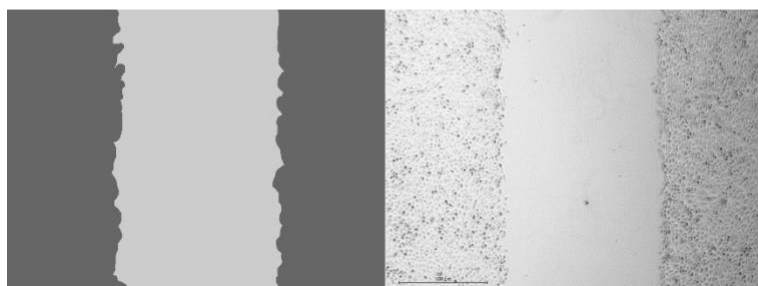

**Incubation time – 24 h**

**PEPD concentration – 0 nM**

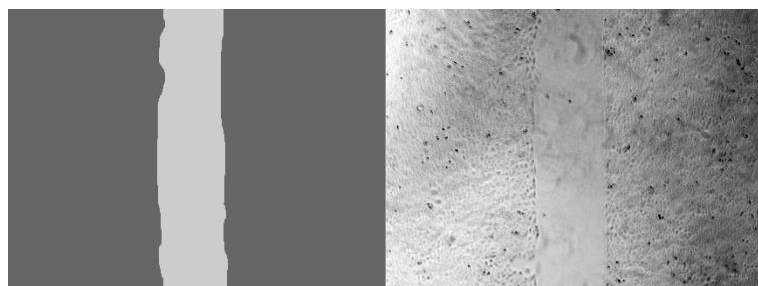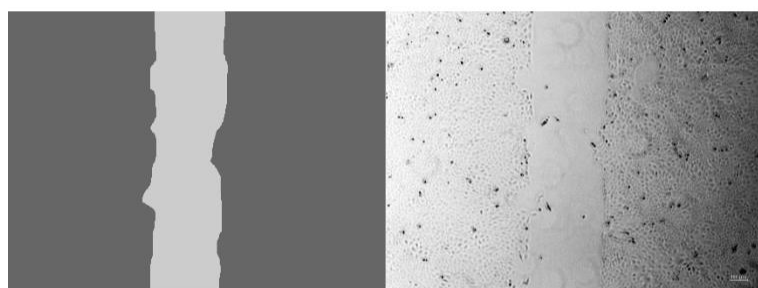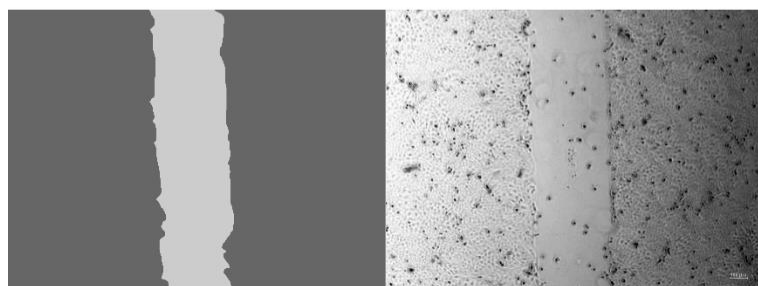

**PEPD concentration – 10 nM**

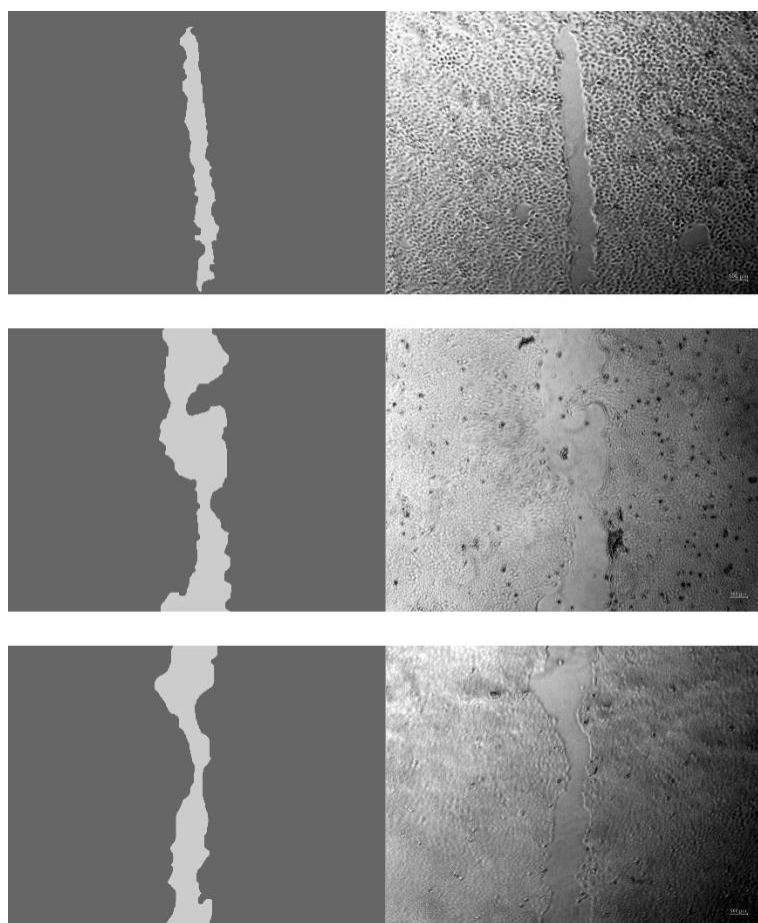

**PEPD concentration – 0 nM + Gefitinib**

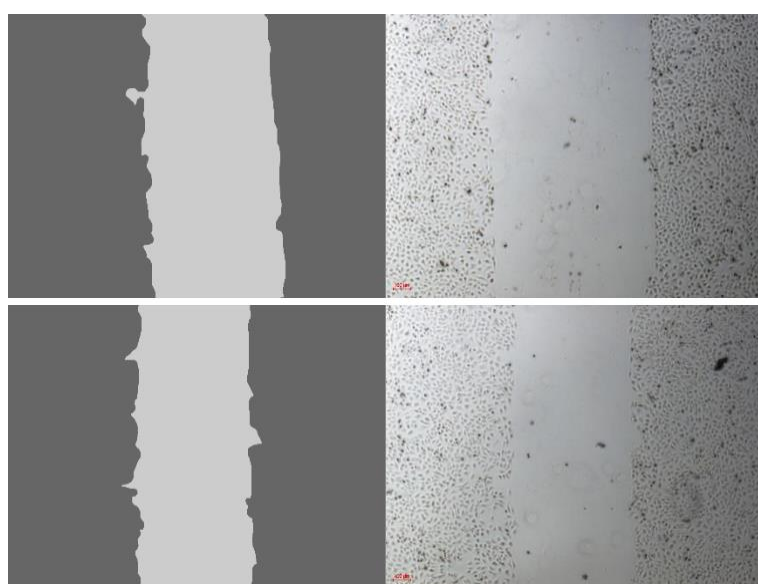

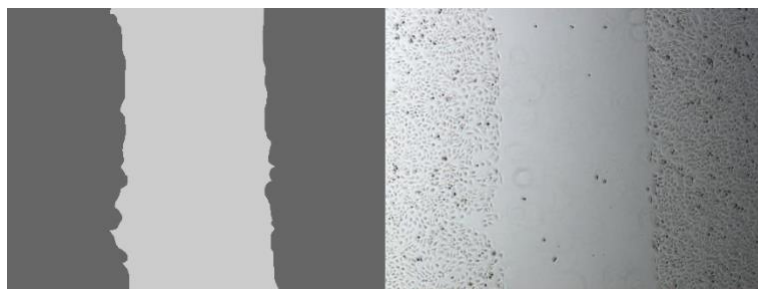

**PEPD concentration – 10 nM + Gefinitib**

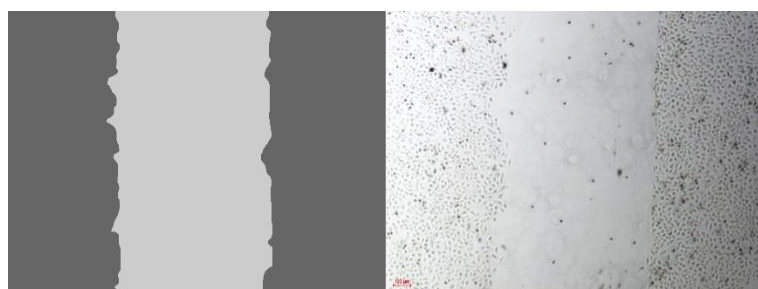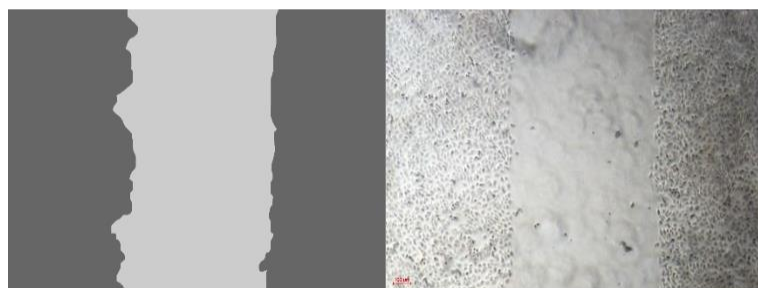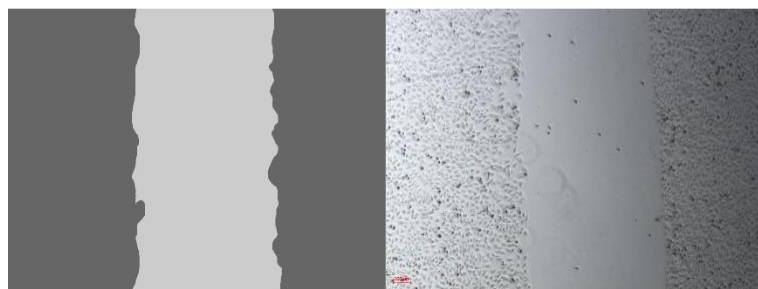

**Figure S5. Representative images of HaCaT cell migration presented on Figure 5B.**

## EGFR expression and its intensity

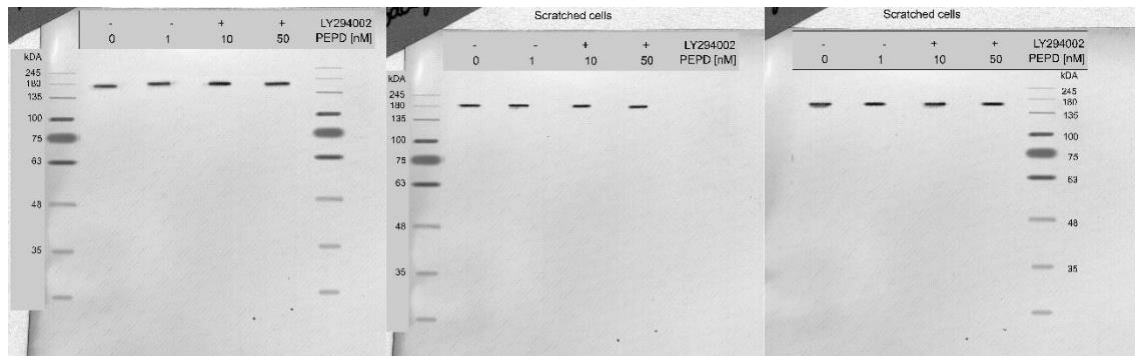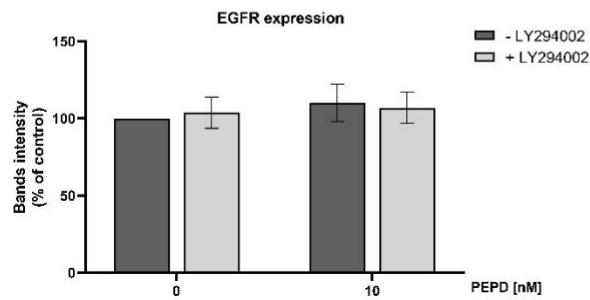

## p-EGFR expression and its intensity

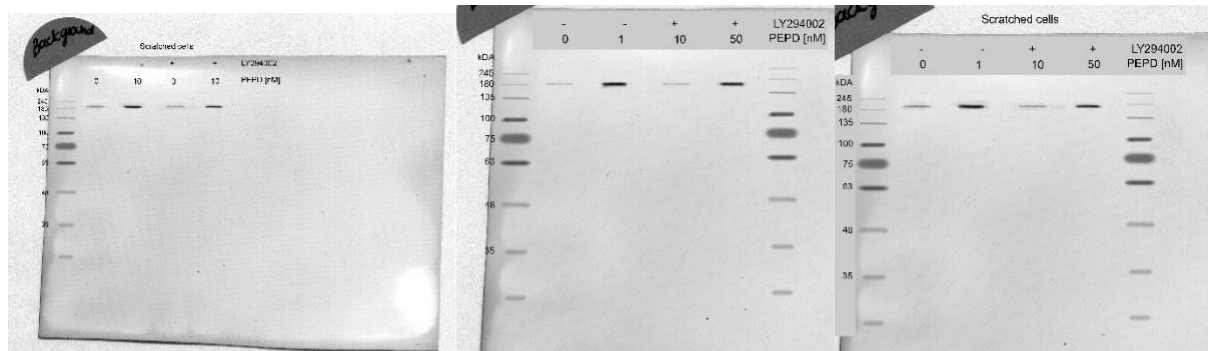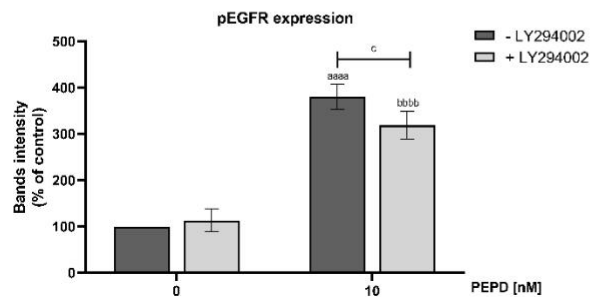

PI3K expression and its intensity

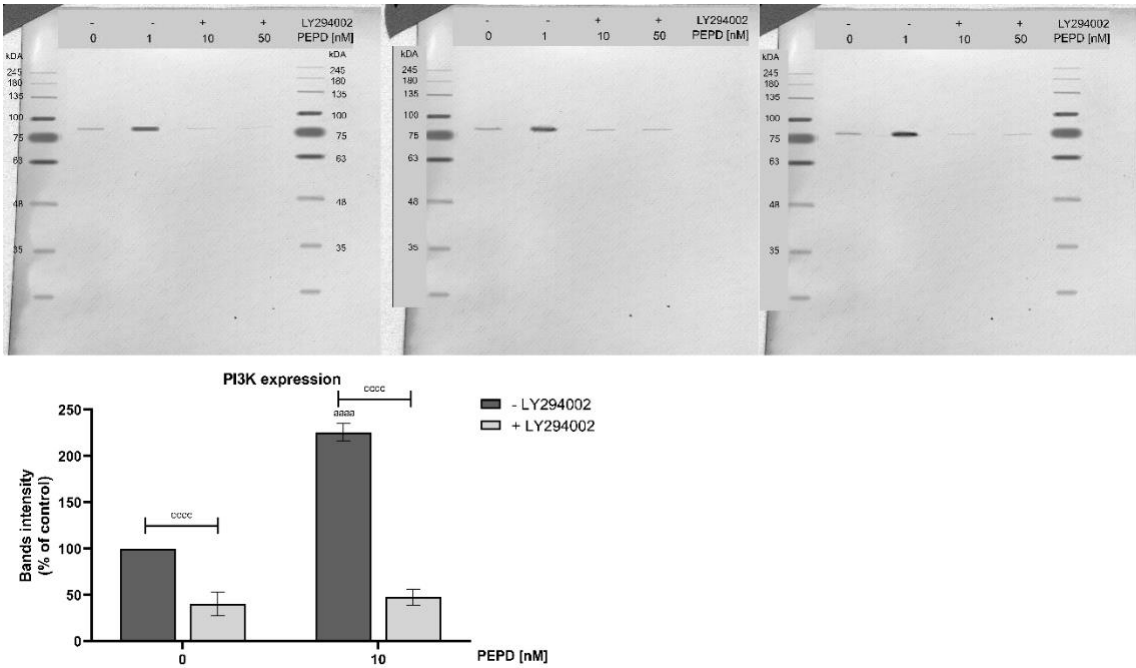

p-PI3K expression and its intensity

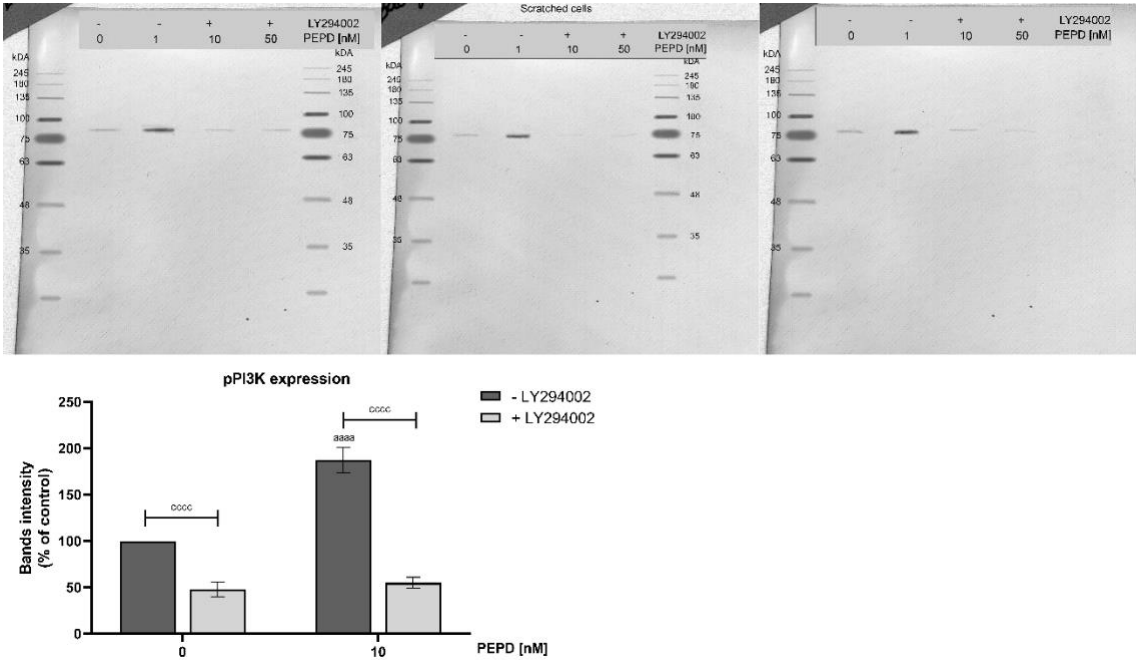

## Akt expression and its intensity

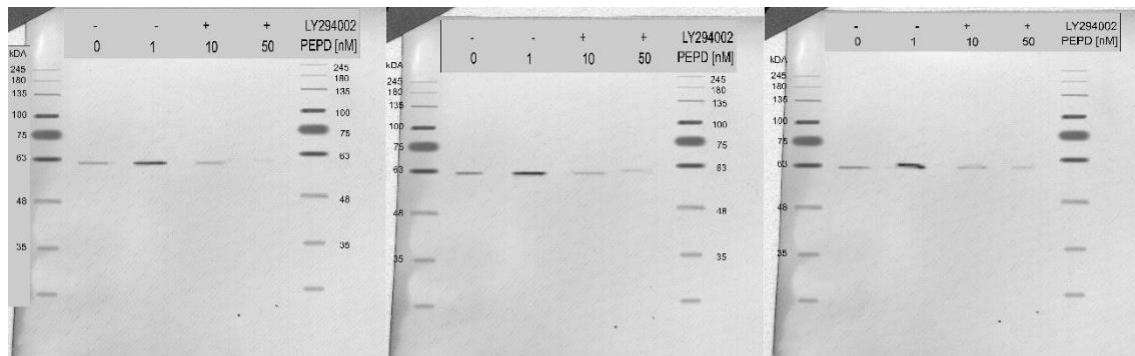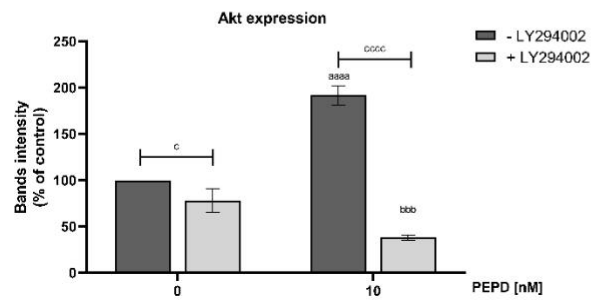

## p-Akt expression and its intensity

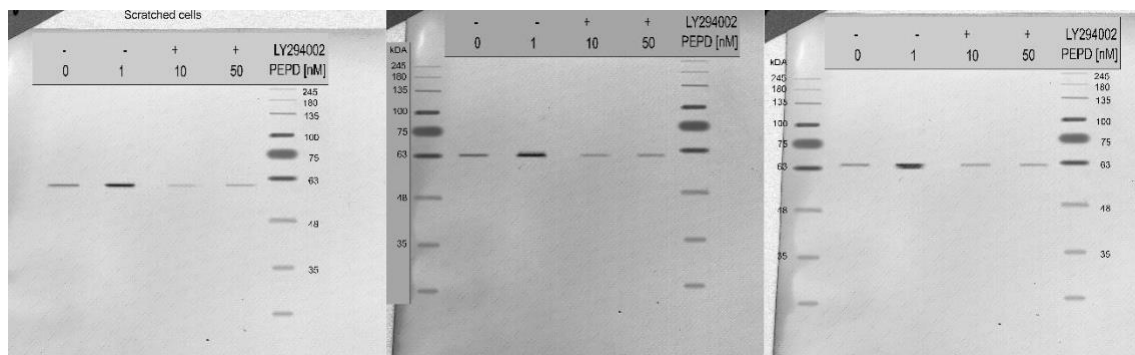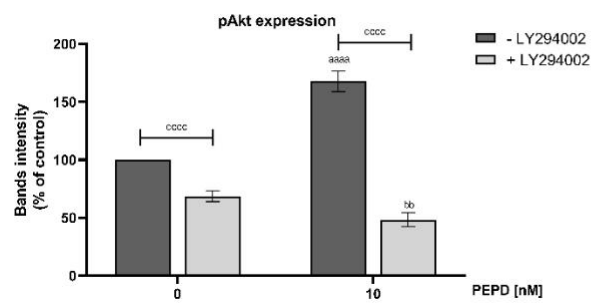



# mTOR expression and its intensity

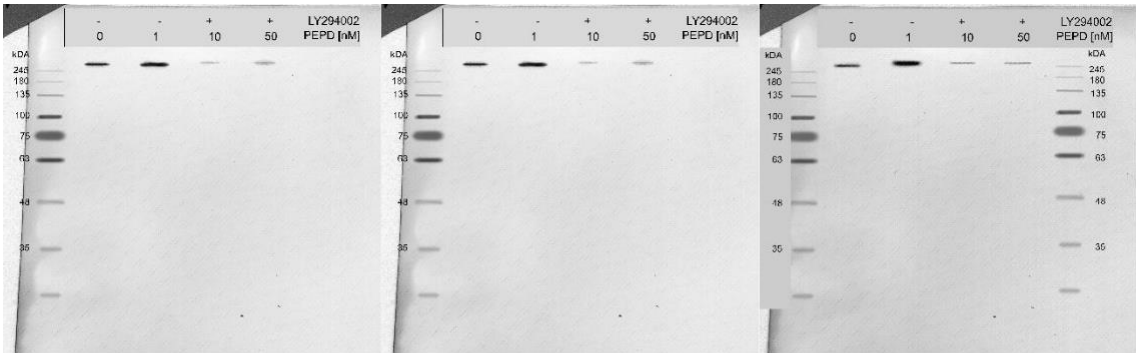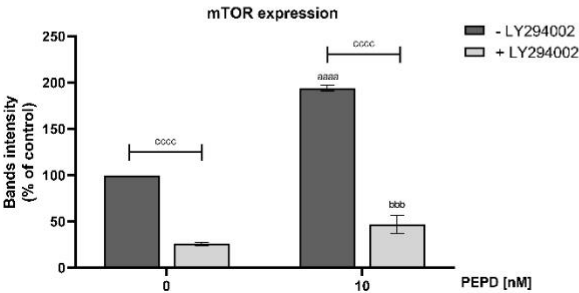

# p-mTOR expression and its intensity

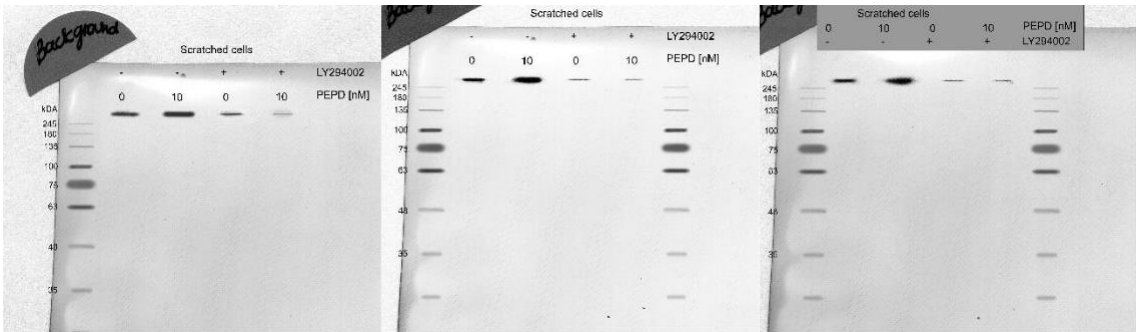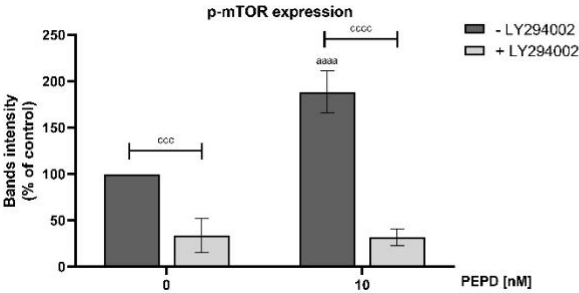



## GAPDH expression and its intensity

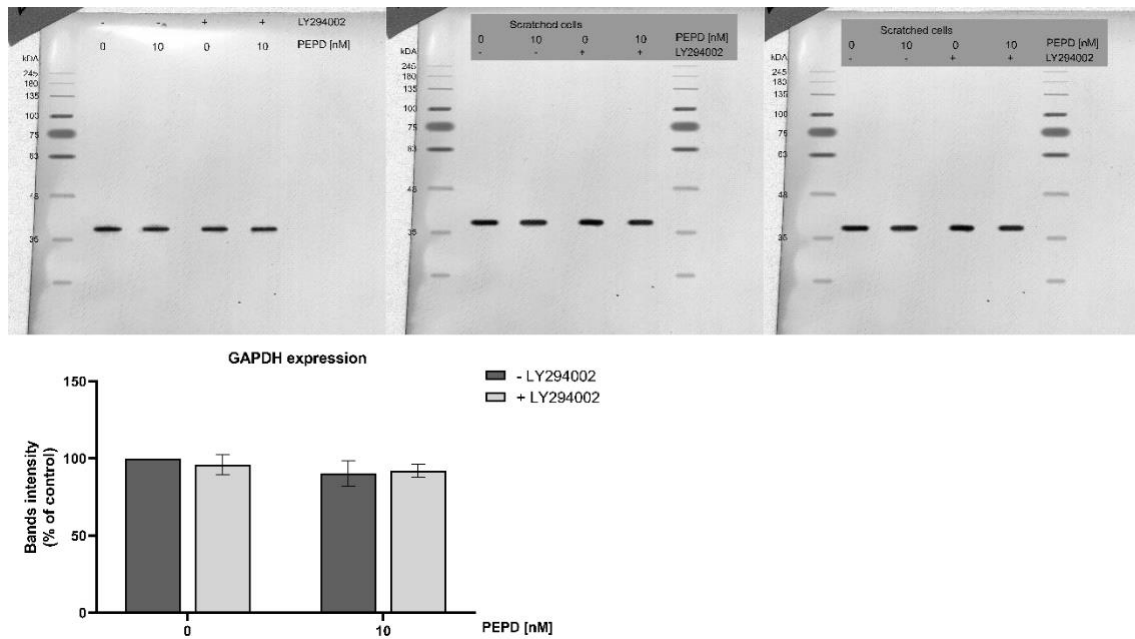

Figure S6. Representative blots from Western blotting analysis presented in Figure 6A.

**Incubation time – 0 h**

**PEPD concentration – 0 nM**

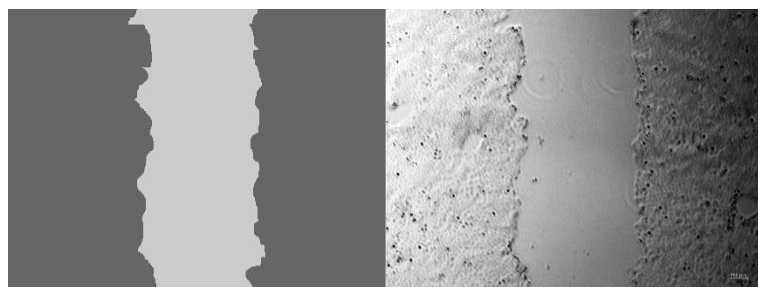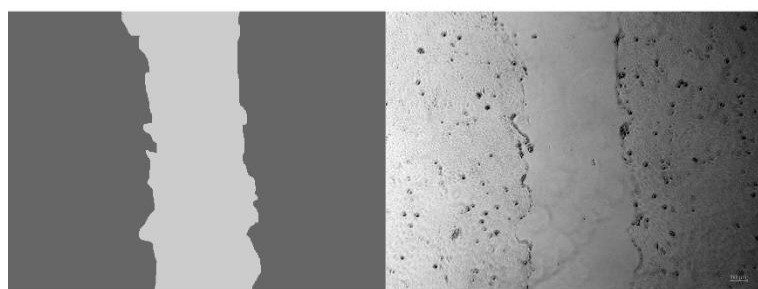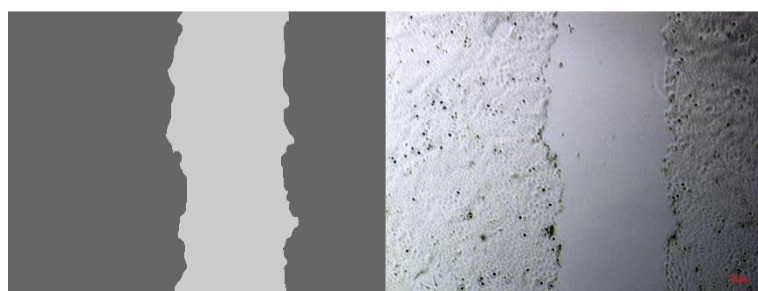

**PEPD concentration – 10 nM**

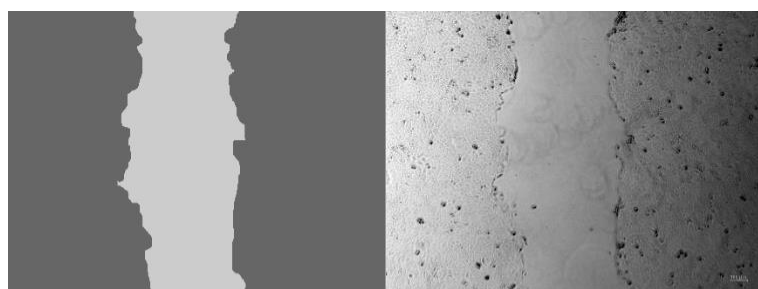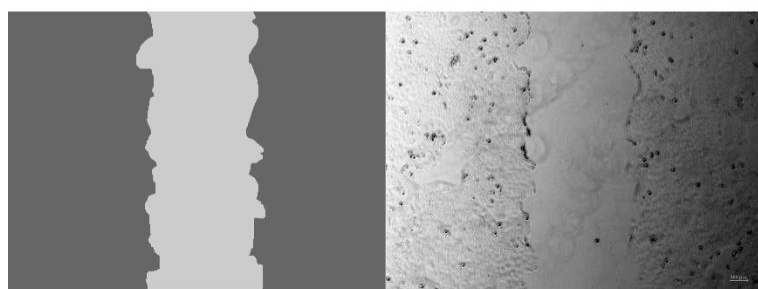

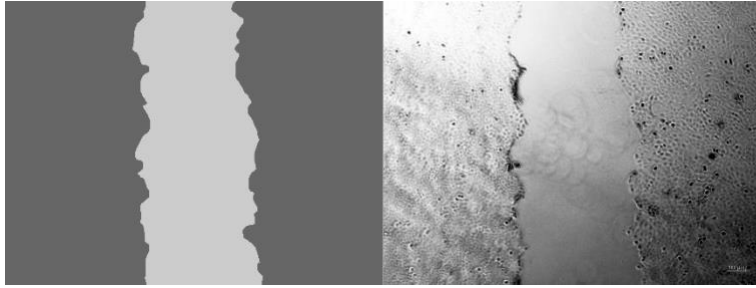

**PEPD concentration – 0 nM + LY294002**

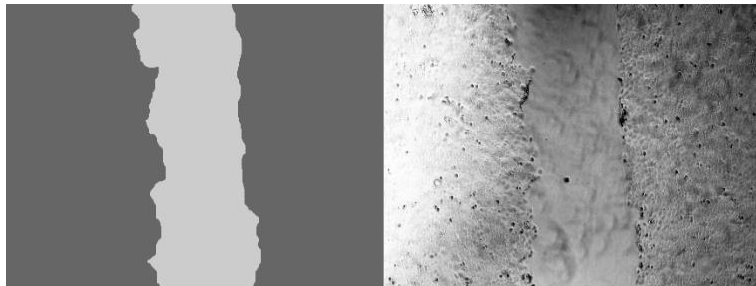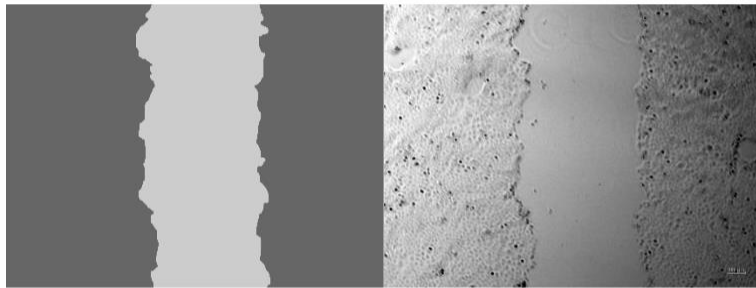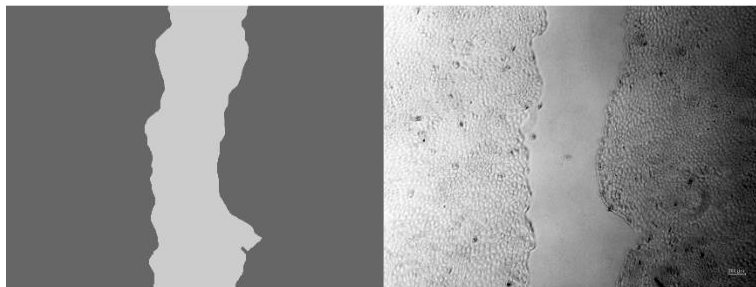

**PEPD concentration – 10 nM + LY294002**

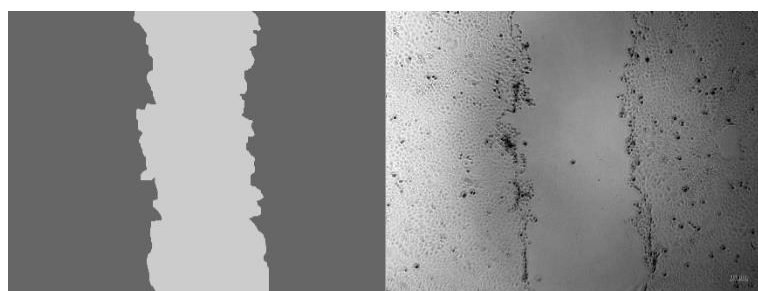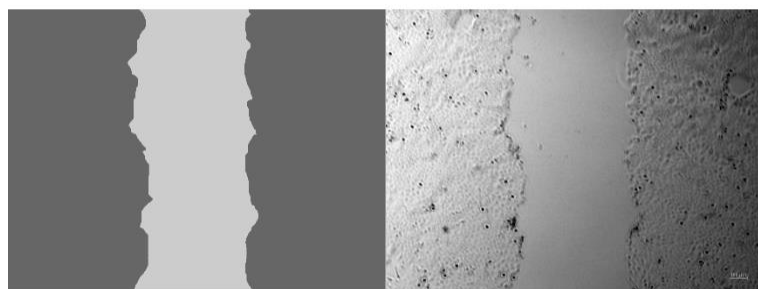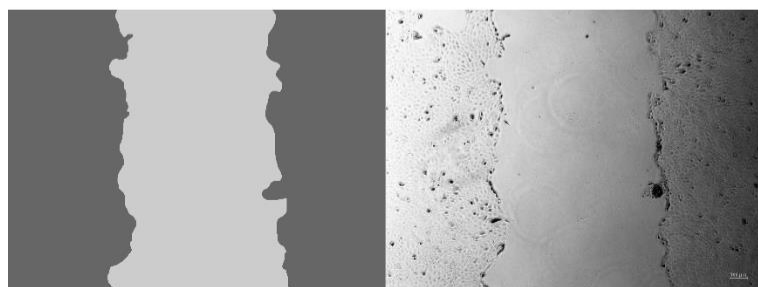

**Incubation time – 24 h**

**PEPD concentration – 0 nM**

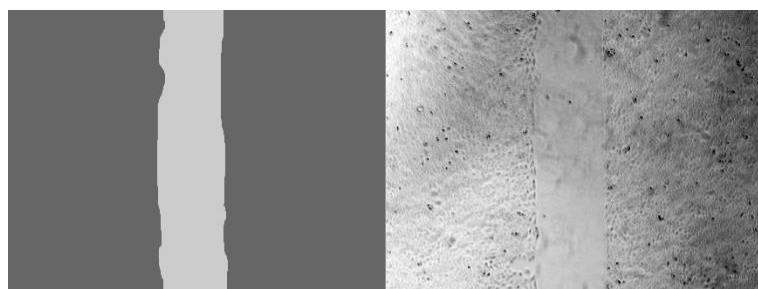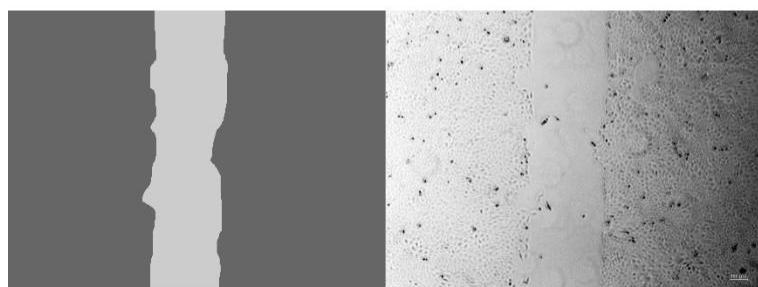

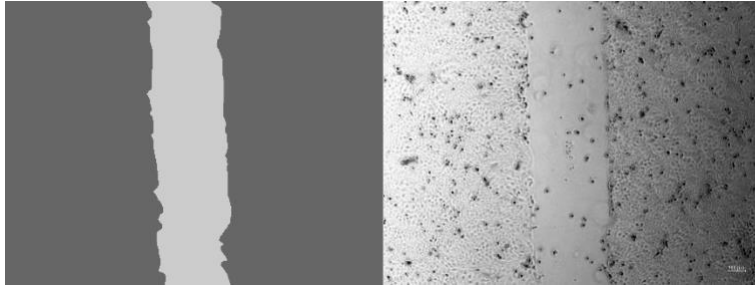

**PEPD concentration – 10 nM**

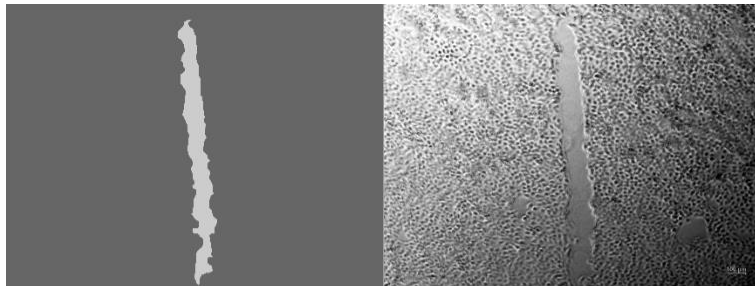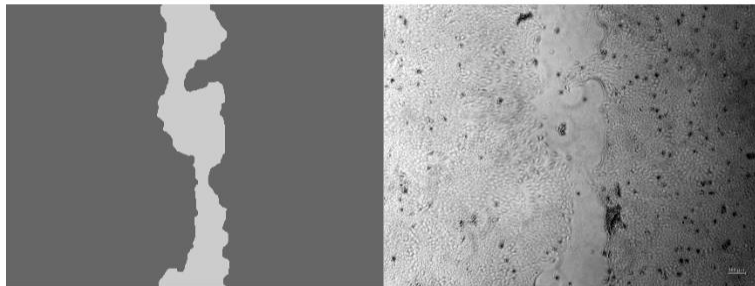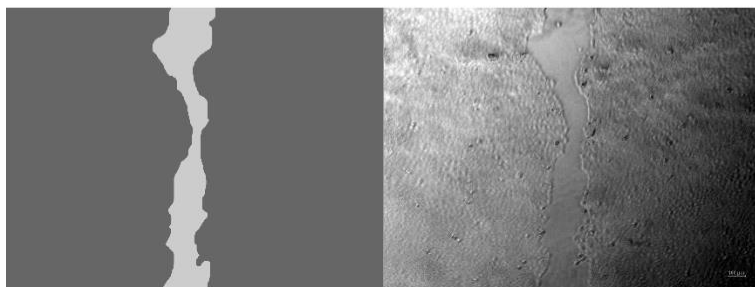

**1.1.4.1.1. PEPD concentration – 0 nM + LY294002**

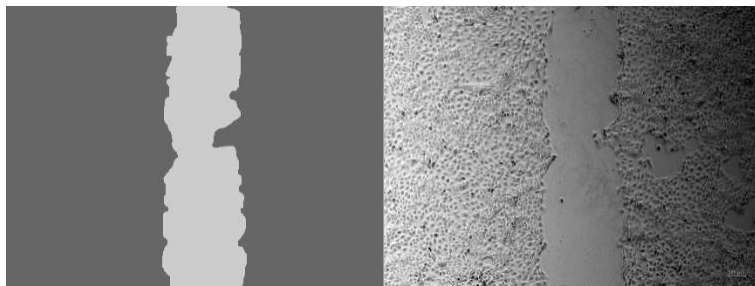

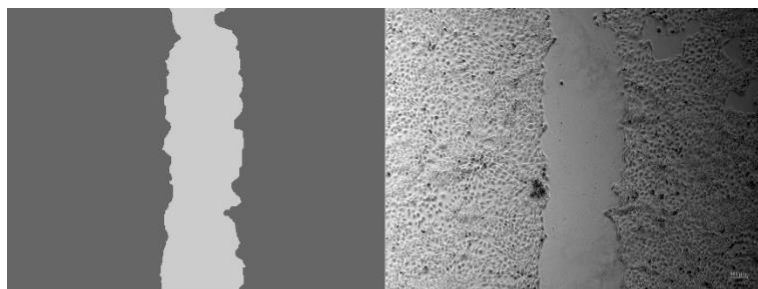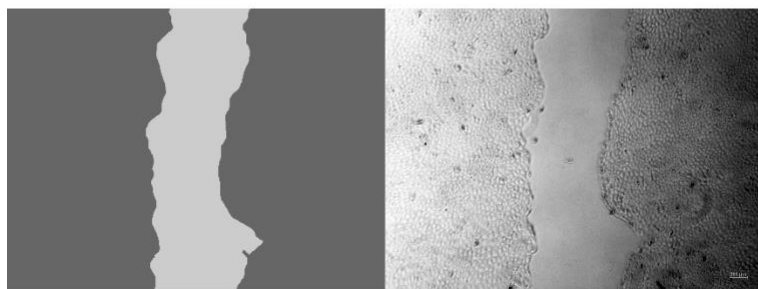

**PEPD concentration – 10 nM + LY294002**

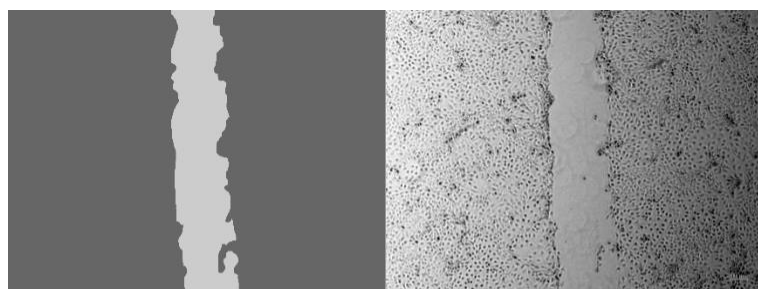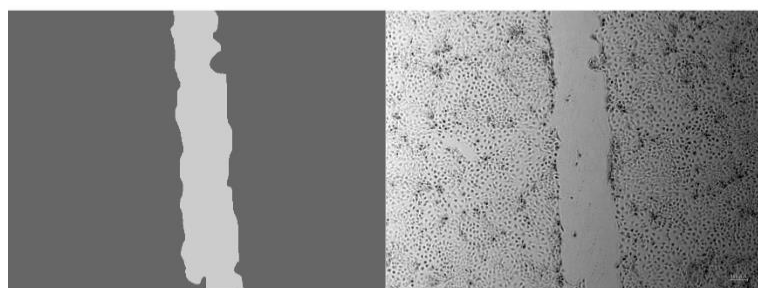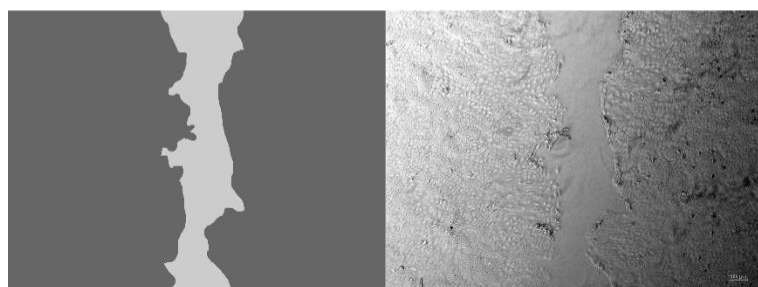

**Figure S7. Representative images of HaCaT cell migration presented in Figure 6C.**

IGF-1R expression and its intensity

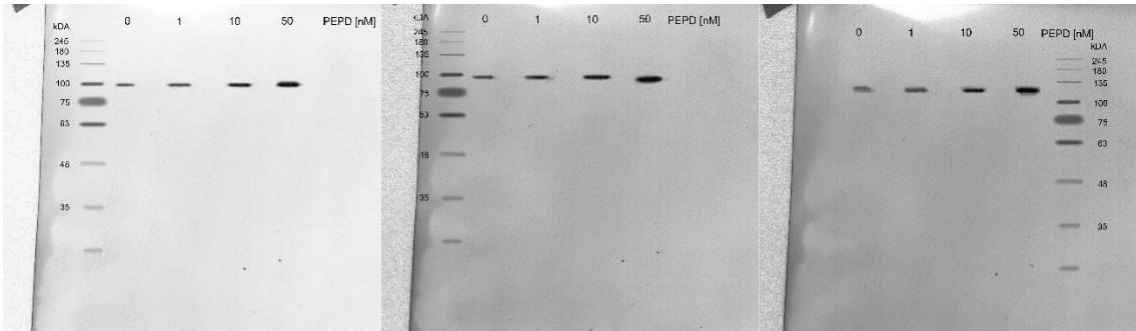

IGF-1R expression

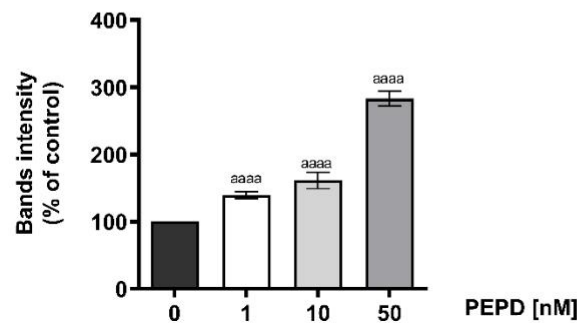

$\beta_1$ -integrin receptor expression and its intensity

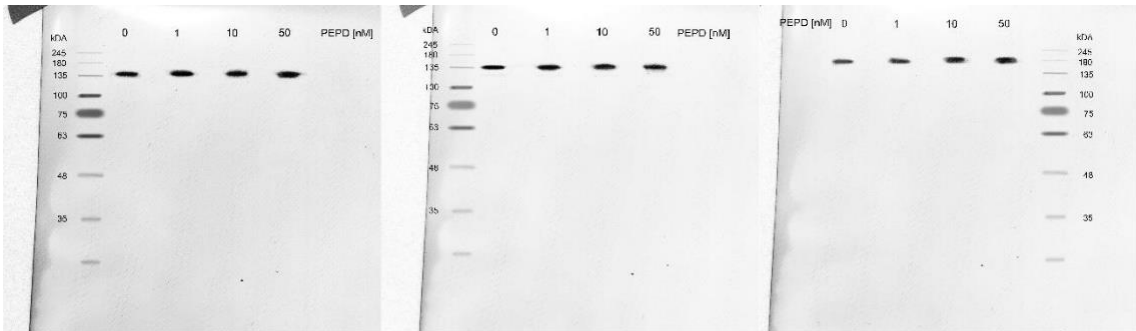

$\beta$ -integrin expression

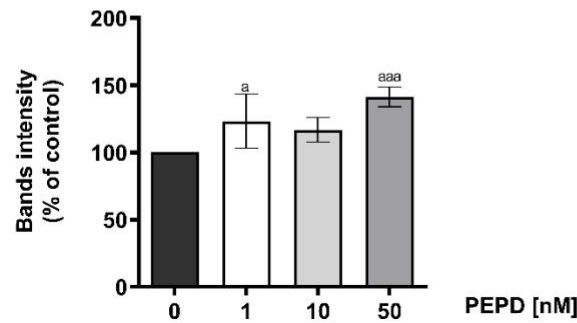

## FAK expression and its intensity

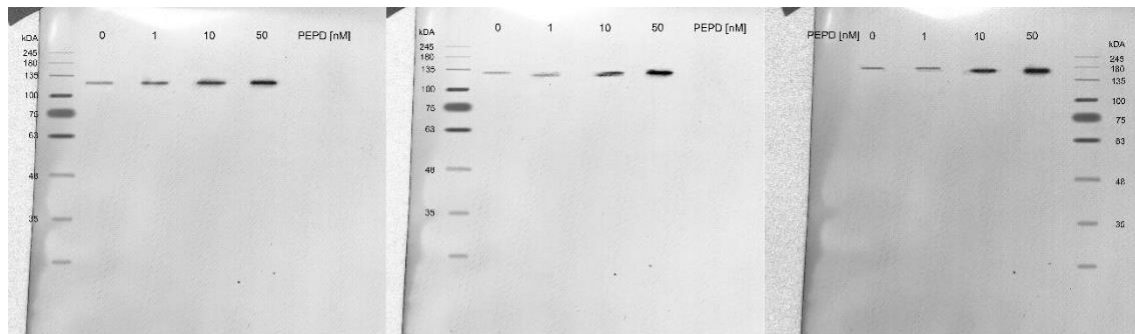

FAK expression

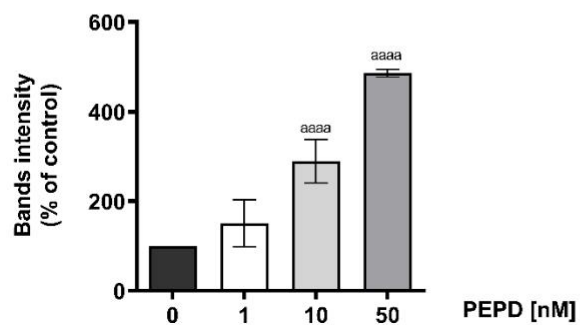

## p-FAK expression and its intensity

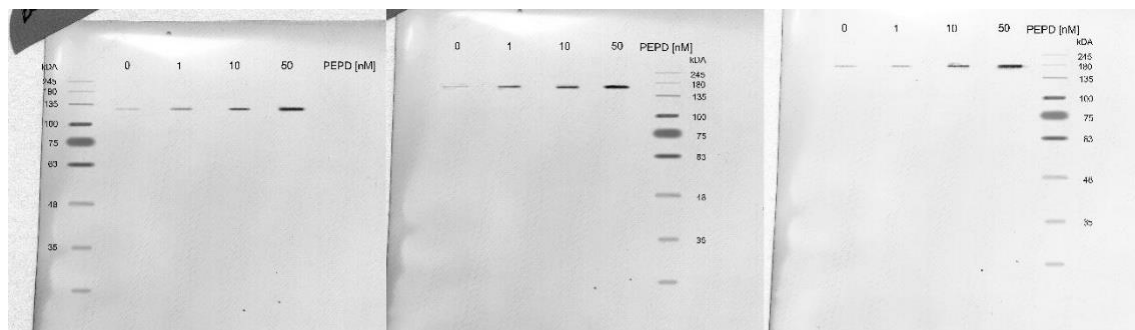

p-FAK expression

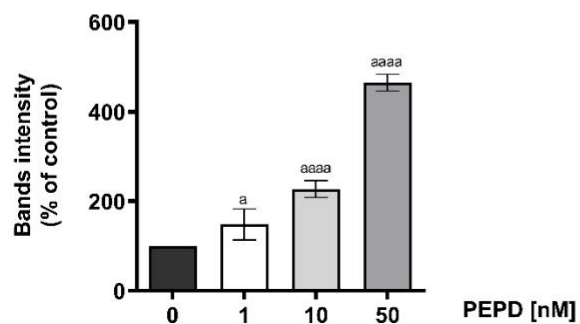



## Grb2 expression and its intensity

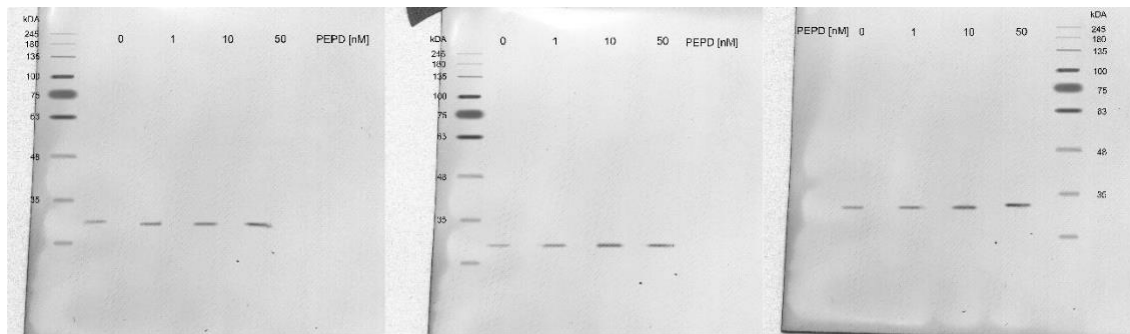

Grb2 expression

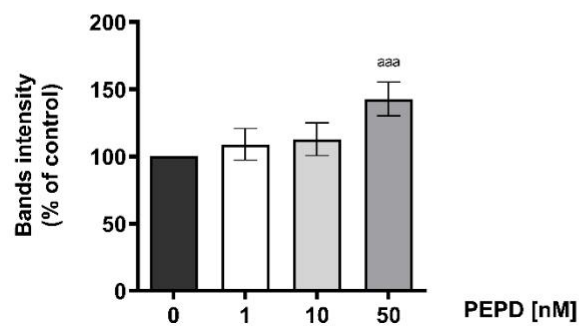

## Sos1 expression and its intensity

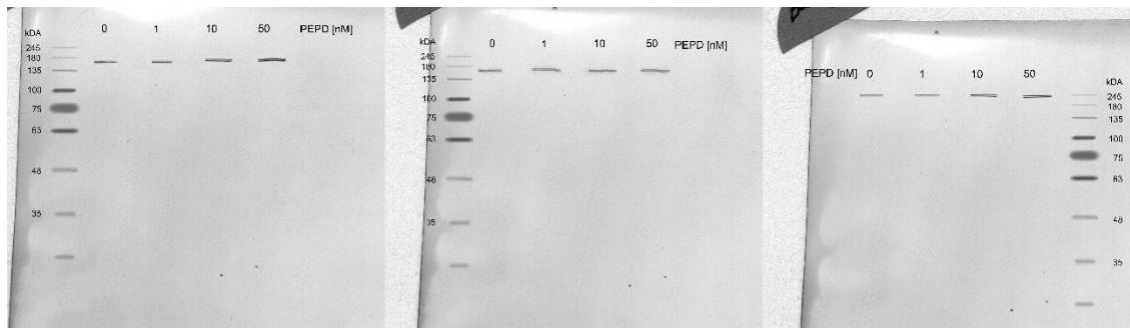

Sos1 expression

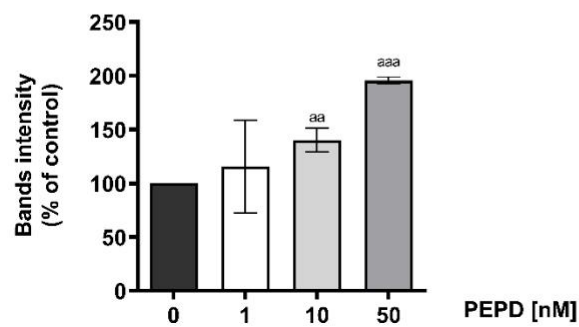

## GAPDH expression and its intensity

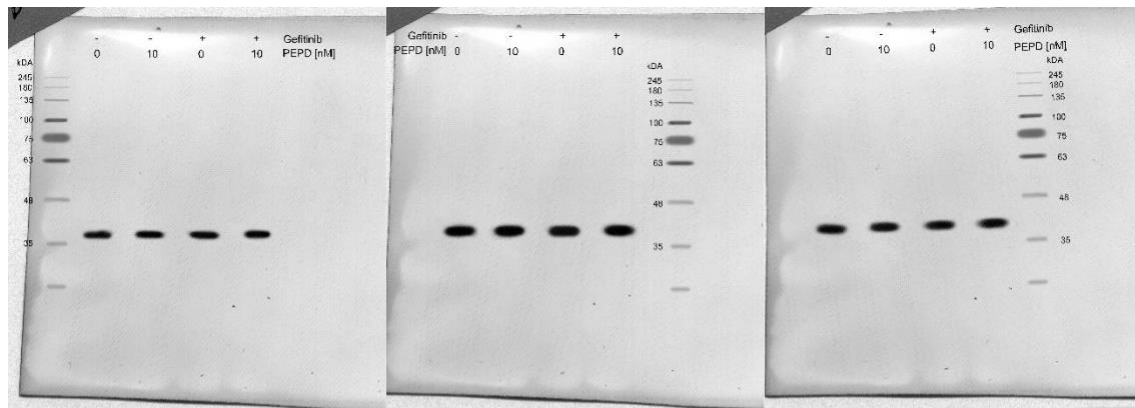

GAPDH expression

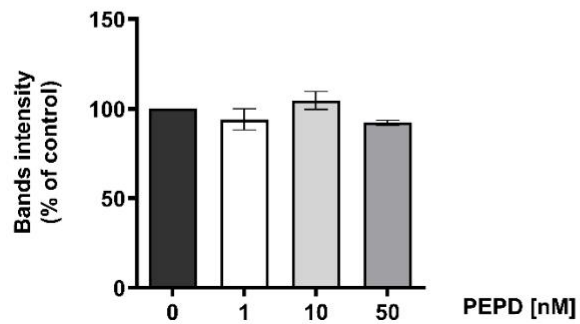

Figure S8. Representative blots from Western blotting analysis presented in Figure 7A.

## E-cadherin expression and its intensity

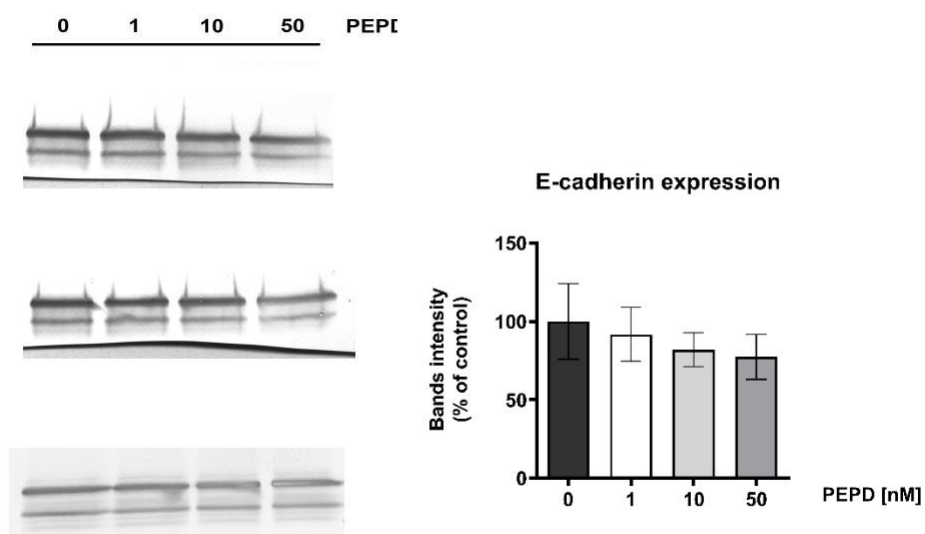

## N-cadherin expression and its intensity

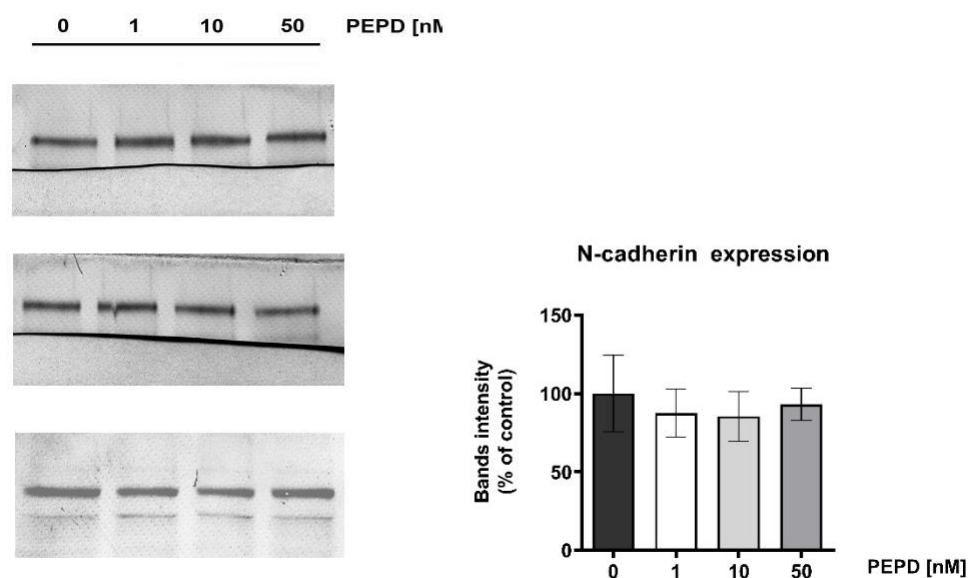

## TGF $\beta$ receptor expression and its intensity

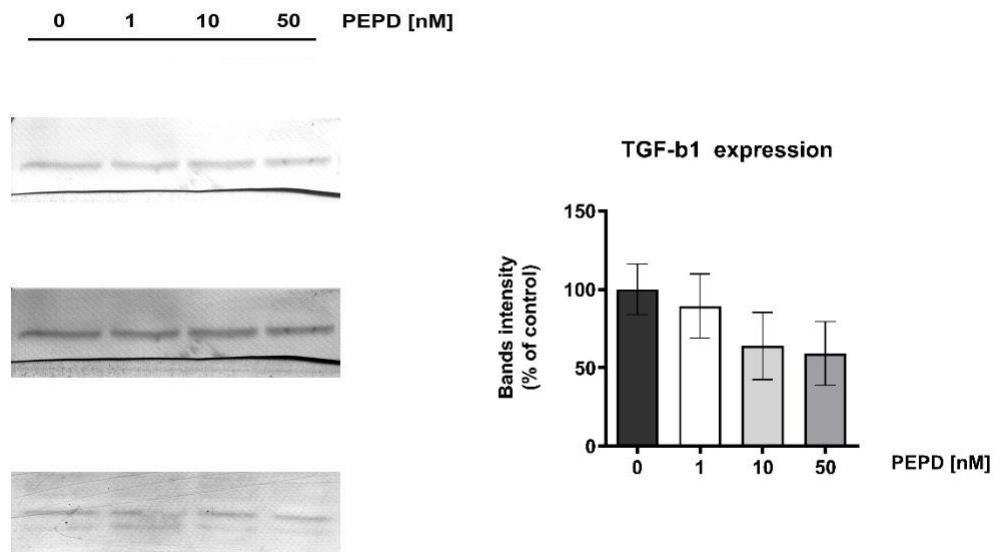

## ERK 1/2 expression and its intensity

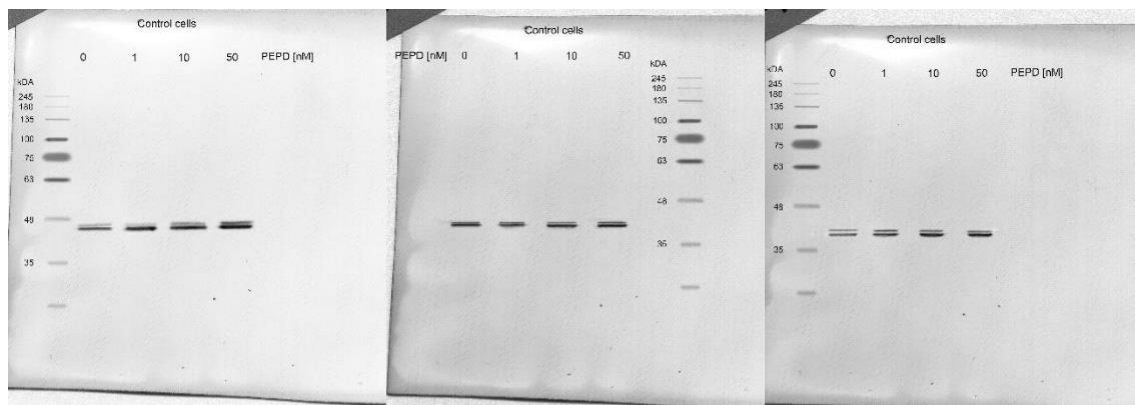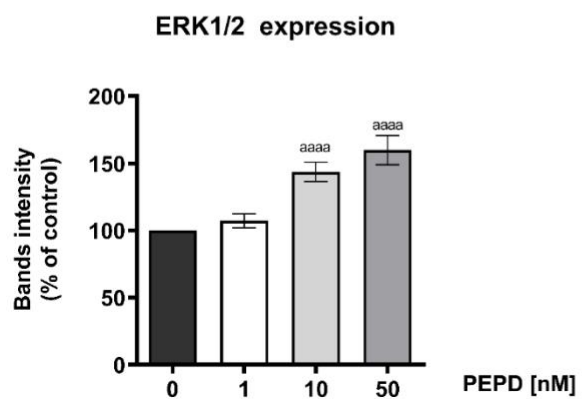

## GAPDH expression and its intensity

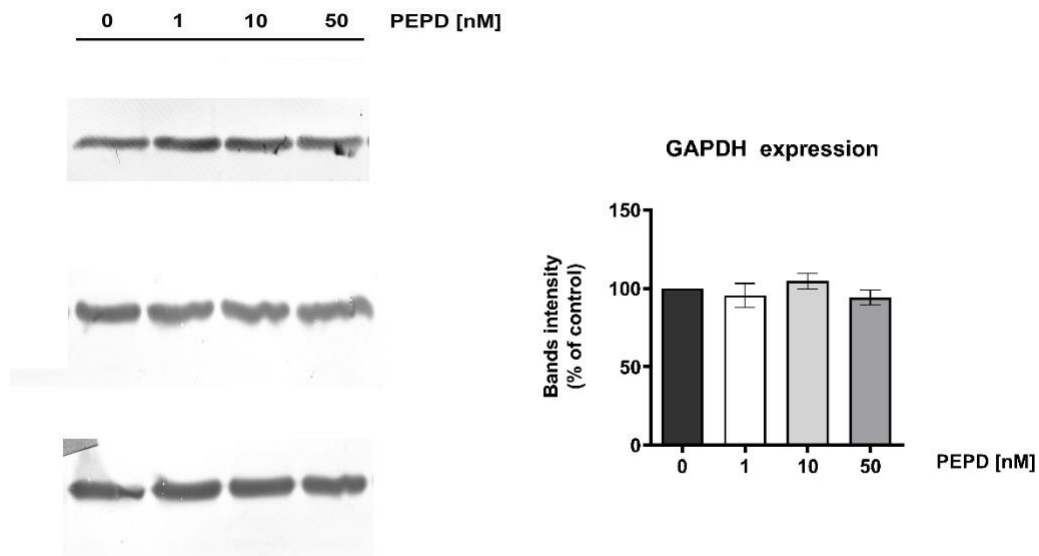

Figure S9. Representative blots from Western blotting analysis presented in Figure 8A.

## NF-kb expression and its intensity

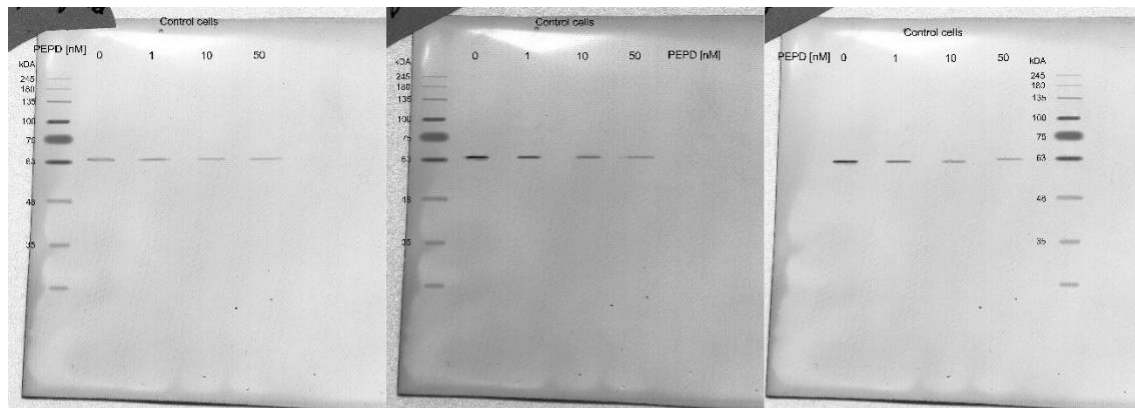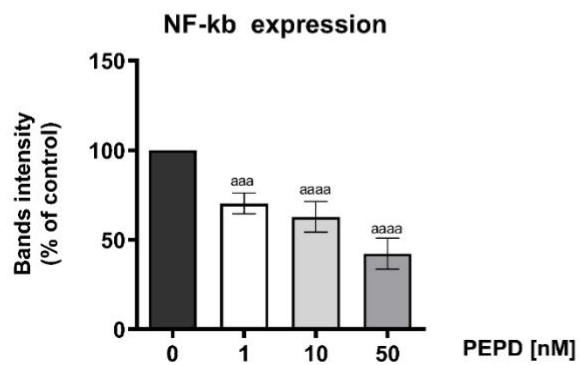

## GAPDH expression and its intensity

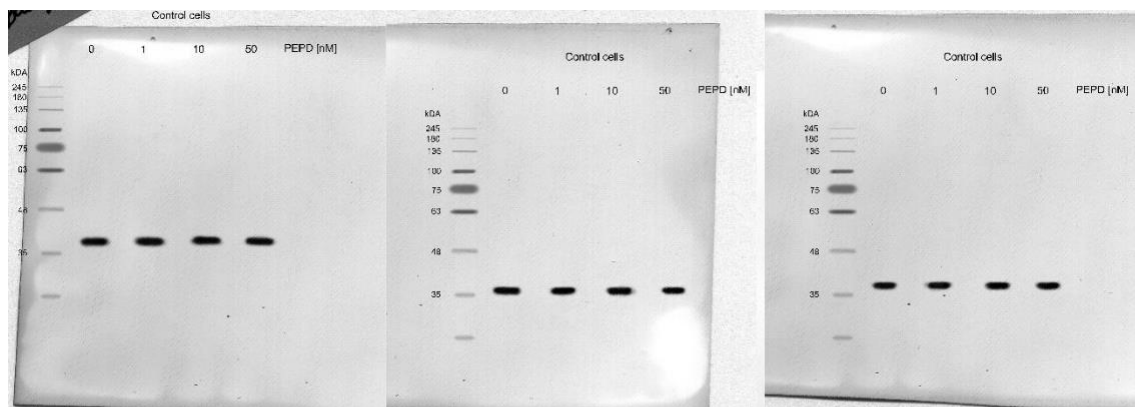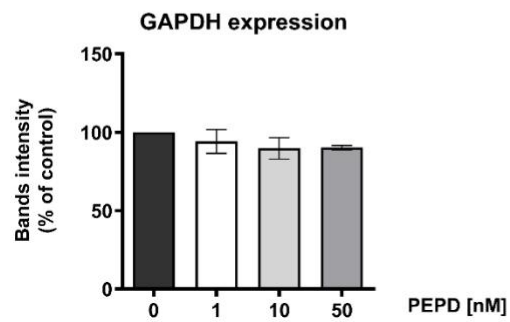

Figure S10. Representative blots from Western blotting analysis presented in Figure 9C.
